# Deterministic Early Endosomal Maturations Emerge From a Stochastic Trigger-and-Convert Mechanism

Harrison M York<sup>1,\*</sup>, Kunaal Joshi<sup>2,\*</sup>, Charles S Wright<sup>2,\*</sup>, Laura Z Kreplin<sup>1</sup>, Samuel Rodgers<sup>3</sup>, Ullhas K Moorthi<sup>1</sup>, Hetvi Gandhi<sup>1</sup>, Abhishek Patil<sup>1</sup>, Christina Mitchell<sup>3</sup>, Srividya Iyer-Biswas<sup>2,4</sup>, and Senthil Arumugam<sup>1,5,6,7</sup>

<sup>1</sup>Monash Biomedicine Discovery Institute, Faculty of Medicine, Nursing and Health Sciences, Monash University, Clayton/Melbourne, VIC 3800, Australia

<sup>2</sup>Department of Physics and Astronomy, Purdue University, West Lafayette, IN 47907, USA

<sup>3</sup>Department of Biochemistry and Molecular Biology, Biomedicine Discovery Institute, Monash University, Clayton/Melbourne, VIC 3800, Australia

<sup>4</sup>Santa Fe Institute, Santa Fe, NM 87501, USA

<sup>5</sup>ARC Centre of Excellence in Advanced Molecular Imaging, Monash University, Clayton/Melbourne, VIC 3800, Australia

<sup>6</sup>European Molecular Biological Laboratory Australia (EMBL Australia), Monash University, Clayton/Melbourne, VIC 3800, Australia

<sup>7</sup>Single Molecule Science, University of New South Wales, Sydney, NSW 2052, Australia

Endosomal maturation is a critical and fundamental process for robust transport of cargo (such as activated receptors) to specific cellular compartments in a timely manner. The most prominent model of endosomal maturation involves a phosphoinositide-driven gain or loss of specific proteins at the level of individual endosomes, emphasising an autonomous and stochastic model of maturation. However, to date, direct whole cell-level measurements of absolute number of maturation events have not been performed, owing to limitations in fast, volumetric imaging. Here, we use lattice light-sheet imaging to track individual very early and early endosomes over the entire population. We demonstrate that direct inter-endosomal contact drives the maturation from very early (APPL1-positive) to early (EEA1-positive) endosomes. Using fluorescence lifetime, we show that this endosomal interaction is underpinned by the asymmetric binding of EEA1 to very early and early endosomes through the N- and C-termini, respectively. Thus, stochastic microtubule-mediated inter-endosomal interactions through EEA1 provide a mechanism to bring temporal and population-level control to the process of endosome maturation. Our findings indicate that APPL1- to EEA1-positive endosomal maturation is not a result of autonomous endosomal events but is driven by heterotypic EEA1-mediated endosomal interactions.

endosomal maturation | ensemble rates | 3D particle tracking | lattice light-sheet | FLIM

Correspondence: [harrison.york@monash.edu](mailto:harrison.york@monash.edu), [iyerbiswas@purdue.edu](mailto:iyerbiswas@purdue.edu), and [senthil.arumugam@monash.edu](mailto:senthil.arumugam@monash.edu)

## Introduction

In cellular signal transduction, information is often encoded as a transient pulse or as a temporal pattern of signals. The binding of growth factors to their receptors results in activation of secondary messengers followed by critical deactivation of receptors through the interaction with phosphatases and lysosomal degradation (1, 2). This combination of events in the signal transduction pathway typically encodes the temporal pattern. The endosomal pathway, where both spatial trafficking and biochemical maturation of endosomes occur in parallel, is a central process that modulates the interaction of receptors with enzymes embedded in other organelles, such as the endoplasmic reticulum, or degradation via the

lysosomal pathway (3). Following formation at the plasma membrane via endocytosis, endosomes carrying cargoes undergo maturation processes (4) facilitated by the concerted effects of motility, inter-endosomal fusions, fissions, and endosomal conversions. These latter switch-like processes involve protein conversions, in which one specific set of proteins are shed and another acquired (5, 6). This occurs in concert with phosphoinositide conversions, in which specific phosphoinositide species act as the modules of coincidence detection (7). Thus, phosphoinositide species provide a second layer of regulation, governing which proteins will localise to a specific subset of endosomes (8, 9). Epidermal growth factor receptors (EGFR) have been shown to depend on dynein for receptor sorting and localisation to mature endosomes (10, 11). In addition, localisation of EGFR to EEA1 compartments was delayed when dynein was inhibited. On the other hand, expansion of APPL1 compartments enhanced EGFR signalling, consistent with the role of endosomal maturation in modulating temporal activity of receptors in endosomes. An open question that arises then is, what is the role of dynein-mediated motility in endosomal maturation? Furthermore, in the context of trafficking of cargo such as EGFR, that respond to pulsatile patterns of ligands, how do populations of endosomes mature in a timely manner that ensures accurate signal interpretation?

Our current understanding of the dynamics of endosomal maturations comes from seminal live-cell imaging studies that captured the process of individual endosomes undergoing direct conversions (5, 6). These observations led to the prevailing single endosome-centric model wherein a phosphoinositide switch controls the transition from adaptor protein, phosphotyrosine interacting with PH domain and leucine zipper 1 (APPL1) to early endosomal antigen 1 (EEA1) on an individual endosome (6). APPL1 and EEA1 bind to endosomes via coincidence detection binding to Rab5, as well as the phosphoinositides PI(3,4)P2 and PI(3)P, respectively. Zoncu et al. showed that PI(3)P was required for long-lived EEA1 endosomes; they also observed reversions of EEA1-to-APPL1 conversion upon inducible deple-

tion of PI(3)P, suggesting that APPL1-to-EEA1 maturation is underpinned by a phosphoinositide switch resulting in PI(3)P production. In mammals, PI(3,4)P<sub>2</sub> can be dephosphorylated to PI(3)P by either of two phosphoinositide 4-phosphatases, INPP4A and INPP4B (12, 13), which have been suggested to have distinct intracellular localisations, with INPP4A being found on Rab5-positive endosomes (8, 14). Nonetheless, these single endosome-centric maturation models do not address population-level maturation rates, which are essential for bulk regulation of receptor trafficking, and therefore signal interpretation. Secondly, the single endosome-centric models rely on stochastic binding of molecules, which is unpredictable as a mechanism. Stochasticity poses crucial challenges in maintaining causal ordering and temporal specificity, i.e., a tight probability distribution of events in time. However, despite the emphasis on stochasticity in constituent dynamics in the vesicular transport system (15), endosomal trafficking processes display an extraordinary degree of robustness and predictability in delivering cargo to specific intracellular destinations, and receptors transported through the endosomal system show reproducible signalling outcomes. These properties suggest that there exist mechanisms to counter the stochasticity of the constituent processes and thus to achieve tight control over maturation, trafficking, and dynamics of the intracellular transport system. A limiting factor in extending and reconciling the previously established single endosome-centric model to population-level maturation rates has been the difficulty in directly measuring these dynamic events at whole cell levels.

Here, we used lattice light-sheet microscopy (LLSM) live-cell imaging, which allows rapid imaging of whole cell volumes for extended periods of time (16), to measure the whole cell dynamics of APPL1 and EEA1. To quantify these data, we developed a bespoke endosome detection and tracking algorithm to measure large numbers of endosomal collisions, fusions, and conversions occurring within many single cells over a prolonged period of imaging. We complemented these methods with live-cell fluorescence lifetime microscopy (FLIM) to interrogate the molecular orientation of EEA1, a head-to-head homodimer bound to maturing early endosomes. We show that very early endosome (VEE) to early endosome (EE) conversion is a multistep process, underpinned by the multiple asymmetric binding sites of EEA1 and its cyclical conformation changes, which is brought about by endosomal collisions and heterotypic fusions. Through simulations, we test the effectiveness of our proposed mechanism in predicting the maturation time course, specifically, the conversion from APPL1 to EEA1 and from N- to C-terminal EEA1 attachments. These results warrant a significant upgrade to the model of endosomal maturation, with heterotypic interactions—where collisions lead to triggered conversions or fusions—forming a large fraction of events leading to endosomal maturation. Furthermore, our simulations indicate that this emergent mechanism imparts tight temporal control over the ensemble maturation of VEEs.

## Results

**Measuring and quantifying whole cell-level endosomal maturation.** To simultaneously measure ensemble endosomal conversion dynamics, and also follow individual endosomes at whole cell levels with fast spatiotemporal resolution, we used lattice light-sheet microscopy (LLSM) to image cells expressing APPL1-EGFP (17) and TagRFP-T EEA1 (18). LLSM-based live-cell imaging enabled near-diffraction limited prolonged imaging of ~30 minutes with a temporal resolution of ~3 seconds per entire volume of the cell with minimal photobleaching (Figure 1a–d, Supplementary Movie 1). Rapid LLSM imaging confirmed minimal overlap between APPL1 and EEA1 signals with the exception of rapid switch-like APPL1 to EEA1 conversions (Figure 1e–f), as has been reported previously (6). Visual inspection of the data revealed three major categories of dynamic phenomenologies: inter-endosomal ‘kiss-and-run’ events preceding conversions, inter-endosomal collisions leading to fusion, and conversions (Figure 1g, Supplementary Movie 1, 2).

The number of distinct events, and their highly stochastic nature, preclude interpretations based on human-biased selection of representative trajectories. We therefore developed an automated image analysis pipeline to convert raw data to full trajectories of detected endosomes, automatically annotated for the presence of events such as heterotypic collisions, conversions, and fusions. Briefly, we identified all potential endosomes using a blob detection routine (Laplacian of Gaussian operator), then filtered to the true endosomes with an unsupervised pattern recognition-based routine (Figure 1c). The brightest and dimmest objects (>100 total) were taken to represent true versus false endosomes, respectively, then used as inputs for template matching to construct a set of features for each class, followed by *k*-means clustering into signal versus background. These discrete segmented objects were then tracked using a custom tracking routine built with trackpy (19), using both localisation and intensity values (Figure 1d, Supplementary Movie 2). Tracked objects from opposite channels were then analysed independently to identify collision, fusion, and conversion events based on the time course of spatial separation between nearby endosomes (Figure 1e, f).

**Inter-endosomal interactions are necessary for robust conversions.** To investigate whether heterotypic interactions play a regulatory role in very early endosomal maturation, we applied this analysis pipeline to six untreated and two nocodazole-treated whole cell volumes (equivalent to >1 hour of total observations), which resulted in detection of thousands of events. A representative montage of a conversion preceded by multiple collision events is shown in Figure 1g, with the corresponding intensity trace (with annotated events) in Figure 1h. We applied stringent selection criteria to all automatically identified events to select only clear cases of APPL1 to EEA1 conversion (Supplementary Figure 2, Supplementary Movie 3), confirmed by visualisation of population-average signals of APPL1 and EEA1 immedi-

ately before, during, and after each conversion event. During the process of conversion, APPL1 and EEA1 signals for the same endosome showed average colocalisation for  $\sim 30$  s (Supplementary Figure 3a), but with considerable variability. This is demonstrated by separating all events into cohorts defined by the total duration of APPL1–EEA1 colocalisation (in bins of 10 s); population averages for each cohort are shown in Supplementary Figure 3b. During visual inspection of these data, we noticed a clear association between the speed of individual APPL1 to EEA1 conversions and the number of preceding heterotypic collisions. To confirm this observation, we calculated the number of collisions occurring between each APPL1 endosome and any EEA1 endosomes in the 30 s immediately prior to a detected conversion or fusion event, then segmented the distribution of events from each colocalisation cohort according to the number of preceding heterotypic collisions (Figure 2a). Importantly, all slow detected APPL1 to EEA1 conversions and fusions had few or no potential collisions prior to conversion. The relative numbers of each type of event (collision-induced or unaided, fusion or conversion) are summarised in Figure 2b. In line with previous models of EEA1-mediated fusion (20, 21), 39% of the events displayed immediate fusion following collisions ('unaided fusions'). This could be attributed to EEA1-mediated fusion where EEA1 molecules can bridge two endosomes at the instant of collision, as has been postulated previously (21–24). 38% of events involved fusions, but that were preceded by at least one heterotypic collision ('collision-induced fusions'). While 12% of events represented unaided conversions, which have been reported earlier, collisions leading to conversions were found to be 11% of all events. Together, these events form the endosomal maturation process. Note that heterotypic fusions result in endosomes with both APPL1 and EEA1, and represent an intermediate step in conversion (*vide infra*). The quantitative analysis also revealed that unaided conversions were more prominent for larger endosomes (Supplementary Figure 3c), whereas the heterotypic collisions were a feature of a much broader and smaller size of endosomes that showed stochastic directed runs and transitions to periods of little movement, as has been reported for early endosomes (25). These results underline the necessity of rapid volumetric imaging and bespoke analysis routines to capture the described processes.

**APPL1 and EEA1 are counter-clustered during conversion.** Furthermore, we observed that in nocodazole-treated cells, some endosomes showed vacillating 'back-and-forth' fluctuations between the signals of APPL1 and EEA1, never fully committing to a complete conversion into an EEA1-positive endosome that did not revert (Supplementary Movie 4). Interestingly, a few endosomes displaying EEA1 fluctuations were also 'pulsatile', suggesting existence of clustering (Supplementary Figure 4), non-linearity, and binding–unbinding events that corresponded to more than a few molecules. Many endosomal markers and associated proteins including dynein have been reported to exist as clusters on the endosomal surface (26–29). In addition, phosphoinositide lipids display clustering induced by binding of specific

proteins (30). Therefore, we reasoned that, given the observed dynamics, APPL1 and EEA1 may display some level of clustering.

To confirm the existence of clusters of EEA1, we performed single molecule localisation microscopy using EEA1 Dendra-2 (31). We found that EEA1 was not uniformly distributed over the entire surface of the endosomes, but instead formed distinct domains (Figure 2c). To confirm this observation in live cells and to investigate the distribution of EEA1 with respect to APPL1, we performed multi-colour live super-resolution microscopy via super resolution by radial fluctuations (SRRF) (32) of APPL1 and EEA1 (Supplementary Movie 5). Interestingly, we observed that APPL1 and EEA1 are counter-clustered (Figure 2d). Both APPL1 and EEA1 show dynamic localisation with time, but this counter-clustering is maintained through the process of conversion, until the APPL1 signal is lost (Figure 2e).

**Two distinct populations of EEA1 endosomes bound via N- and C-termini exist.** Taken together, our experimental observations suggested that heterotypic interactions contribute to the initiation of conversion processes. Therefore, we hypothesised that the inter-endosomal binding ability of the EEA1 homodimer and the presence of heterotypic collisions may work together to seed conversions. EEA1 projects out into the cytoplasm due to its  $\sim 200$  nm-long coiled-coil domain (21, 24); furthermore, it can bind to endosomal membranes at both its N- and C-terminal ends (33). Whilst at the C-terminal domain, EEA1 binds to membranes through the coincidence detection of Rab5 and PI(3)P (24, 34, 35), at the N-terminus, EEA1 solely binds to Rab5 through a zinc finger-binding domain (24, 36). We therefore rationalised that in a heterotypic collision, the incident APPL1 endosome would have little to no PI(3)P, and as such the only EEA1 binding that is probable is through N-terminal binding, thus producing an encoded precedence in EEA1 N- versus C-terminal binding.

To determine which terminus of EEA1 is bound to the already EEA1-positive endosome, and which domain binds to the incoming nascent endosome, we utilised fluorescence lifetime microscopy (FLIM). We reasoned that N-terminally tagged EGFP-EEA1 combined with an RFP FRET partner could distinguish N- from C-terminal binding using the lifetime of EGFP, since EEA1 is 200 nm in length in its straight conformation, and it binds directly to Rab5 via its N-terminus (Figure 3a). Multi-scale molecular dynamics simulations also suggest that the coiled-coil domain can extend with a tilt up to  $50^\circ$  from the normal to the endosomal membrane surface when bound using the C-terminal FYVE binding domain (37). Thus, N-terminal binding will result in decreased fluorescence lifetime due to FRET with Rab5 labelled with RFP, whereas C-terminal binding will show the EGFP lifetime since no FRET will take place. We first investigated whether different populations of EEA1-positive endosomes, bound via N- or C- termini, exist in fixed cells. We found that EEA1 endosomes showed two strikingly distinct populations: C-terminally bound EEA1 that localised closer to the nucleus of the cell (Figure 3c), and N-terminally bound

EEA1 that was predominantly peripherally localised (Figure 3b, c).

Additionally, we were able to detect these same two populations of endosomes using the inverse FRET pair using Rab5 EGFP lifetime in cells transfected with EEA1-TagRFP, in contrast to cells transfected with only EEA1-EGFP (Supplementary Figure 5). These experiments strongly indicate that, in newly generated endosomes, the first EEA1 binding occurs via the N-terminus.

**EEA1 binding via the N-terminus precedes binding via the C-terminus.** To map the temporal dynamics of EEA1 binding via the N- or C-termini, we performed live-cell FLIM of EGFP-EEA1 and Rab5-mRFP. However, live-cell FLIM using confocal microscopy with sufficient temporal resolution to capture endosomal processes intrinsically results in a reduced number of collected photons. To overcome this, we took advantage of *a priori* knowledge from fixed cell experiments and fit live-FLIM data with the two lifetime components detected in fixed experiments. This gave a shorter lifetime component corresponding to N-terminally bound EEA1, where GFP can ‘FRET’ with Rab5-RFP, and a longer fluorescence lifetime corresponding to C-terminally bound EEA1, where the N-terminus is at least 150 nm away, extended into the cytoplasm from the Rab5 RFP. We then separated the detected photons collected at each pixel based on these two components, effectively giving an ‘NT EEA1’ and a ‘CT EEA1’ channel (Figure 3a). Using this fitting, we visualised the initial appearance of EEA1 on Rab5-positive, EEA1-negative endosomes following a collision–conversion event. We observed that only N-terminally bound EEA1 (Figure 4a, b; Supplementary Movie 6, 7) localised on these Rab5-positive endosomes and displayed an increasing signal of C-terminally bound EEA1, concomitant with fusions and trafficking towards the perinuclear region (PNR) (Figure 4d, e; Supplementary Movie 8). This gradual acquisition of C-terminal EEA1 seen through the increase in longer lifetime components and reduced N:C intensity ratio (Figure 4e) suggests a concurrent phosphoinositide conversion of PI(3,4)P<sub>2</sub> into PI(3)P, with the initial trigger via N-terminally bound EEA1, even for unaided conversions.

Whilst EEA1-EEA1 fusions are commonly observed, by separating EEA1 vesicles into their constituent N- and C-terminally bound populations, we observed that fusions primarily occurred when at least one vesicle had C-terminal EEA1 present (Figure 4c). Fusions were most likely to occur between N- and C-terminal EEA1-positive or C- and C-terminal EEA1-positive endosomes (Figure 4c). Endosome pairs with at least one EEA1-negative endosome did not show significant fusions. Remarkably, in cases with both endosomes N-terminally positive, no significant fusions were observed. Two conclusions could be drawn from these results. First, the requirement of at least one C-terminally bound EEA1 and non-fusion of N-terminally bound EEA1-positive endosomes suggest that cross-binding of EEA1 is a necessary step for endosomal fusions to occur. This aligns with previously published results showing that both ends of the endosomal tether must be stably bound to result in endoso-

mal fusion (21, 24). Second, the appearance of N-terminally bound EEA1 prior to C-terminally bound EEA1 in cases of unaided conversions indicates that the N-terminal binding is a necessary and intermediate step before further undergoing a maturation via phosphoinositide conversion into C-terminally bound EEA1.

**Endosomal conversions are driven by phosphoinositide conversions by INPP4A.** To further characterise the maturation into EEA1 endosomes, with N-terminal EEA1 binding preceding C-terminal EEA1 binding in the context of phosphoinositide, we combined the FLIM-based investigation of EEA1 orientation with staining for PI(3)P in fixed cells. To label PI(3)P without inducing overexpression artefacts or steric hindrance, we utilised a purified recombinant GST-2xFYVE probe that could be detected using antibodies against GST as described previously (38, 39). We observed that C-terminally bound EEA1 endosomes have significantly higher PI(3)P labelling as compared to N-terminally bound EEA1 endosomes or the peripheral Rab5-positive, EEA1-negative endosomes (Figure 5a,b). This is in agreement with previously published studies of EEA1 C-terminal co-incidence detection between Rab5 and PI(3)P (33, 40, 41), and suggests that NT-EEA1 appearance may precede PI(3)P production on endosomes.

The two distinct modes of EEA1 binding via the N- and C-termini, and the fraction of unaided conversions of APPL1 to EEA1 observed using LLSM, suggested that phosphoinositide conversion that results in PI(3,4)P<sub>2</sub> to PI(3)P must occur on the incoming nascent endosomes. This hypothesis is supported by live-FLIM data, which showed that a corresponding fraction of endosomes displayed an N- to C-terminally bound EEA1 exchange, strongly suggesting that the source of PI(3)P must be within the same endosomes that have not collided with more mature endosomes. However, it was unclear whether this PI(3)P production triggered during early endosomal maturation was produced through dephosphorylation of PI(3,4)P<sub>2</sub> or phosphorylation of PI. To distinguish these possibilities, we targeted INPP4A, a PI4-phosphatase that dephosphorylates PI(3,4)P<sub>2</sub> to PI(3)P, as well as VPS34, a class III PI3-kinase that phosphorylates PI to generate PI(3)P and is another source of PI(3)P at the early endosomal level (42, 43). To test whether PI(3)P generated via VPS34 contributes to APPL1 to EEA1 conversions, we used SAR405, a drug that specifically targets VPS34 (39, 44). Quantifying and comparing the number of conversions versus untreated cells revealed that SAR405 treatment caused a 3-fold reduction in the number of detected conversions. In contrast, targeting INPP4A using siRNA caused a more severe ~10-fold reduction in the number of detected conversions, suggesting that most conversions were driven by PI(4,5)P<sub>2</sub> to PI(3)P conversion via INPP4A (Figure 5c). Consistent with this result, upon assaying for the binding of EEA1 using FLIM to distinguish between N- versus C-terminal binding, we found a clear reduction in the number of C-terminally bound EEA1-positive endosomes in SAR405 treated cells, but never a complete abolishment, suggesting that INPP4A-mediated phosphoinositide conversions acted as a source for a fraction of

PI(3)P on these early endosomes (Supplementary Figure 6).

### **N-terminal binding of EEA1 is necessary for endosomal maturation.**

To validate the consistent observation of N-terminal binding of EEA1 as a prior to any maturation process, and to investigate the stringency of the requirement for N-terminal binding of EEA1 via Rab5 in maturation, we used an N-terminal mutant of EEA1 carrying F41A and I42A at the C2H2 Zn<sup>2+</sup> site (EEA1 Nt-mut), which is impaired in Rab5 binding (45) (Figure 6a). When expressed in wild-type RPE1 cells, conversions were unimpaired and endosomal fusions were only mildly affected. This suggested that the Rab5 binding mutant, EEA1 Nt-mut, did not display a strong dominant negative phenotype and that the endogenous EEA1 could still function to evince endosomal maturation (Figure 6b). This could be because the observed clustering buffers against dysfunctional mutant EEA1; in addition, as EEA1 is a homodimer, it may still have one active binding site. Therefore, we used a HeLa EEA1 knockout (KO) cell line and transiently expressed EEA1 Nt-mut. In contrast to wild-type EEA1, EEA1 Nt-mut exhibited no heterotypic interactions resulting in maturation per cell over 20 minutes. Furthermore, no EEA1 signals were observed on APPL1 endosomal trajectories, suggesting that the collision-triggered conversion mechanism was dysfunctional owing to impaired Rab5 binding at the instance of collision. It is also to be noted that the expression of EEA1 Nt-mut resulted in larger but fewer and less motile endosomes (Supplementary Movie 8). If only the C-terminus of EEA1, via its Rab5 and FYVE binding, were involved in the phosphoinositide-governed conversion, we would expect to detect some number of APPL1 to EEA1 conversions. In our experiments, unaided conversions were also completely abrogated, indicating that, even in direct conversions, where collisions may not play a role, the N-terminal binding is a compulsory intermediate step. The C-terminus of EEA1 harbours a FYVE domain and a Rab5 binding domain. Unfortunately, our attempts to investigate the role of PI(3)P binding in conversions using a construct with a mutation in the 450PI(3)P binding pocket (R1375A) (41) proved unfruitful. We observed that the localisation of this mutant was largely cytosolic with quick transient binding in some cases, as has been reported elsewhere (41). This prevents any direct measurement of the influence of FYVE domain-based PI(3)P binding on the entire process of conversion. However, it emphasizes the role of PI(3)P binding by the FYVE domain, along with Rab5, in localising EEA1 robustly to the endosomes, in agreement with previously suggested models of dual interactions/coincidence detection of the EEA1 C-terminus (7, 33, 41).

**A feed-forward endosomal conversion model.** To summarise, collisions between endosomes form an important step in overall endosomal conversions rates. The live FLIM data suggests that N-terminally bound EEA1, via interaction with Rab5, is a step preceding the phosphoinositide-based binding of EEA1 via its C-terminal FYVE domain (Figure 4). Expressing the N-terminal Rab5 binding mutant in HeLa EEA1 KO did not rescue any maturation events, suggest-

ing that this is a necessary step (Figure 6). Additionally, super-resolution imaging suggests clustered distribution of EEA1, as well as counter-clustering of APPL1 to EEA1 (Figure 2). This suggests the presence of feedback in the reaction scheme that governs progressively preferential EEA1 binding over APPL1 binding. To construct a plausible model that agrees with our experimental observations as well as the known protein-protein and protein-membrane interactions of the components involved, we designed a computational model that captures the complex interplay between the distinct phosphoinositide molecules, Rab5, APPL1, and EEA1, and the phosphoinositide conversion (Figure 7). Importantly, we took into consideration the N-terminal domain of EEA1, which was observed to bind first in unaided collisions as well as in aided conversions through collisions. To simulate this system, we used a grid on the surface of a sphere with two layers of nodes, consisting of a layer of Rab5 and a phosphoinositide layer which began as PI(3,4)P2 but could be converted to PI(3)P by INPP4A if unbound (14). Binding to these layers of nodes were the agents, each with a different attachment and detachment rate depending on the nodes present: APPL1 binding Rab5 and PI(3,4)P2; N-terminal EEA1 binding Rab5; and C-terminal EEA1 binding Rab5 and PI(3)P. The interaction map of agents and nodes is shown in Figure 7a. Using this reaction scheme, we were able to simulate the reactions and tune the parameters to recapitulate the experimentally observed conversion dynamics, as well as formulate the effects of the ‘trigger and convert’ mechanism (Supplementary Movie 9).

Figure 7b–e shows an example trajectory, beginning with a very early endosome that is APPL1-positive and bound to PI(3,4)P2 and Rab5 via its PH-BAR domain. Spontaneous binding of INPP4A to this endosome can result in conversion of PI(3,4)P2 to PI(3)P; however, with APPL1 occupying most PI(3,4)P2, most INPP4A remains unbound and, therefore, inactive on its substrate. APPL1 can be transiently displaced by N-terminal EEA1, which binds directly to Rab5. Due to the inclusion of a positive feedback switch to mimic the experimentally observed clustering, APPL1 endosomes are relatively stable (i). However, upon the introduction of a large pool of EEA1 as the result of a collision (ii), N-terminal EEA1 can sequester Rab5, thus destabilising the APPL1-Rab5 interactions and resulting in APPL1 desorption (iii). Consequently, INPP4A can now bind to its substrate PI(3,4)P2 and convert it to PI(3)P (iv). This leads to the binding of EEA1 through its C-terminal FYVE binding domain, as well as Rab5 binding (v, vi). In this scheme, the N-terminal binding of EEA1 acts as a trigger. Moreover, since the N-terminus of EEA1 has weak binding affinity to Rab5, we reasoned that the clustered organisation of EEA1 on endosomes, and the interaction of multiple N-terminal EEA1 at the instance of collision, would result in overwhelming the APPL1-Rab5 on the incoming endosome. We simulated the net decrease in conversion time of a single endosome that underwent one collision (Figure 7f), and the net decrease in conversion time of endosomes in a cell allowed to collide randomly at increasing collision frequencies (Figure 7g).

These agent-based simulations showed that clustering has a two-pronged effect on accelerating conversion. If a Rab5 molecule originally surrounded by bound APPL1 is occupied by EEA1, it will become unavailable for binding to APPL1. This creates a ‘hole’ in the APPL1 layer, which decreases the binding affinity of APPL1 in the region surrounding the hole (as compared to a region filled by APPL1, since clustering increases the binding affinity of a species in accordance with the local density of that species). This in turn increases the chance that the hole will expand. On the other hand, clustering of EEA1 attracts more EEA1 to the vicinity of the ‘hole’. These two factors speed up the local back-and-forth conversion between APPL1 and EEA1 clusters, which increases the windows of opportunity for INPP4A to convert PI(3,4)P2 to PI(3)P. A heterotypic fusion between endosomes with N-terminally bound EEA1 and C-terminally bound EEA1, as observed in the live FLIM experiments (Figure 4a) represents only a state with higher N- to C- EEA1 ratio and the reaction scheme will proceed to convert the transiently increased PI(3,4)P2 to PI(3)P, subsequently replacing N-terminally bound EEA1 by C-terminally bound EEA1. Through our simulations, we were able to quantify the net decrease in conversion time due to clustering (Figure 7f). Once a sufficient number of PI(3,4)P2 have converted to PI(3)P, C-terminal attachments dominate since they have a stronger binding affinity, and they require both PI(3)P and Rab5 to bind, rendering Rab5 unavailable for N-terminal attachments.

## Discussion

The endosomal system is highly dynamic, requiring successive biochemical maturation of key lipids and associated proteins to achieve correct targeting of internalised cargo. Whilst the order of appearance of key species has been diligently identified for early endosomes, how the timing of maturation is maintained for each generated vesicle had not been studied. In this work we describe a novel mechanism that ensures timely maturation of vesicles at a whole cell level. Specifically, we present a new trigger-and-convert model of APPL1 to EEA1 early endosomal maturation, as summarised in Figure 8.

In this model, nascent APPL1-positive PI(3,4)P2 very early endosomes (VEEs) undergo active transport along microtubules and collide stochastically with mature EEA1-positive early endosomes (EEs). This collision is a ‘trigger’ that primes the VEE for maturation. Our experimental observations are consistent with a model whereby a cluster of EEA1 is transferred onto the incident VEE following such a collision. Furthermore, this model is in accordance with the following molecular details of EEA1. First, C-terminal EEA1 has a rigid quaternary structure that ensures that the coiled-coil region extends into the cytoplasm, preventing the N-terminus from folding back and binding to Rab5 on the same endosome (21). This would result in the N-terminus of EEA1 being located 160–180 nm from the endosome surface (24), in agreement with observations of two distinct EEA1 populations made in our FLIM experiments. Second, EEA1 possesses two distinct Rab5 binding sites—one correspond-

ing to the C2H2 Zn<sup>2+</sup> finger at the N-terminus and the other overlapping with the PI(3)P binding FYVE domain at the C-terminus. The C-terminal end also contains a calmodulin (CaM) binding motif. The N-terminus forms the stronger Rab5 interaction, whereas the C-terminal interaction, owing to the FYVE domain, operates on a coincidence detection mechanism resulting in specificity to PI(3)P-containing vesicles. While the exact steps at the instant of collision fall beyond the scope of this manuscript, it is conceivable that a collision would result in the stronger N-terminus–Rab5 interaction overriding the C-terminus interactions. Furthermore, an unexplored but plausible mechanistic detail lies in the interactions of Ca<sup>2+</sup>/CaM with Rab5 and the C-terminus of EEA1, which antagonises PI(3)P binding, and may operate to release C-terminal binding when the N-terminal interactions take place as a result of collision (46, 47). Whether transient Ca<sup>2+</sup> spikes operate to mediate transfer of molecules remains an attractive detail to investigate.

After collision, the sequestration of Rab5 via N-terminal EEA1 results in desorption of APPL1 clusters. The reduced APPL1 binding to Rab5 also exposes PI(3,4)P2 to dephosphorylation by 4-phosphatases, producing PI(3)P. The most likely candidate for this reaction is INPP4A, since it localises to Rab5-positive EEs (8, 14). This availability of PI(3)P now enables EEA1 to bind via its C-terminal FYVE domains, thereby resulting in the irreversible maturation to an EEA1-positive EE. This mature endosome is in turn able to trigger more conversions of APPL1 VEEs following collisions, thus ensuring continual maturation of this dynamic population of vesicles.

Consistent with other studies of descriptions of specific domains on endosomes, we observed that both VEEs and EEs showed a counter-clustered APPL1 and EEA1 distribution. The hypothesis that clustering plays a key role in ensuring a more robust process was recapitulated through our simulations, which suggested it to be essential for the timely conversion of these vesicles. An attractive hypothesis is that phosphoinositide clustering underlies the observed protein distributions, as phosphoinositide clustering has been demonstrated in other vesicular and tubular membrane entities (30). Additionally, Rab5 has also been suggested to be clustered (29). A clustered distribution of EEA1 or its binding partner Rab5 in the incident endosome would ensure that a higher probability of transfer of EEA1 molecules exists following a collision. Furthermore, this would produce large fluctuations of EEA1 intensity on a converting endosome, as observed in our imaging movies.

Previous studies have shown that stochastic fluctuations have a significant effect on trafficking and maturation processes (15). The greater the stochasticity in a system, the more the system dynamics favour non-steady state biochemical maturation over steady state vesicular exchange in cellular transport pathways. Biochemical maturation is characterised by a first passage time event in which the first instance of complete maturation of the compartment in question marks a point of no return. But the noise due to the inherent stochasticity in the system poses challenges to robust directional flow of ma-

terial, which requires tight regulation on exchange processes between organelles. It was shown by Vagne and Sens that the presence of positive feedback in the maturation process can significantly suppress the stochastic fluctuations, and Golgi cisternae use homotypic fusions as the likely mechanism to overcome this challenge (15). In a similar vein, our proposed mechanisms of clustering, collision, and heterotypic fusion each provide positive feedback to the maturation process and are essential in the robust functioning of the exchange processes through noise suppression.

The specific requirement for INPP4A, which converts PI(3,4)P<sub>2</sub> to PI(3)P on the maturing endosome, ensures a definitive distinction between APPL1- and EEA1-positive endosomes. This is achieved by the depletion of PI(3,4)P<sub>2</sub>, which ensures that APPL1 cannot rebind following desorption, and thus that conversions are unidirectional. Therefore, even though VPS34-mediated conversion of PI to PI(3)P forms the major source of PI(3)P, we hypothesise that a more significant role is played in the process of APPL1 to EEA1 maturation by virtue of depletion of PI(3,4)P<sub>2</sub> and subsequent enrichment of PI(3)P even before the newly generated endosomes have fused with endosomes bearing VPS34-derived PI(3)P.

A relevant protein complex to this work is the mammalian class C core vacuole/endosome tethering (CORVET) system, which functions to mediate endosomal fusion independently of EEA1 (48). Surprisingly, overexpression of the N-terminal mutant of EEA1 also resulted in a similar phenotype of smaller, more fragmented APPL1 endosomes, with the exception that we found no APPL1-EEA1 double positive endosomes. It is unclear at what stage CORVET operates, and dissection of this question is beyond the scope of this study. However, the strong phenotype observed for the N-terminal mutant of EEA1 reinforces the role of EEA1 in self-regulating APPL1 to EEA1 conversion.

What is the physiological relevance of this mechanism? The trigger-and-convert approach provides emergent regulation of the timing of early endosome maturation, leading to a tightly controlled and more timely and consistent flux of maturation, able to overcome the intrinsic stochasticity of single molecule protein-protein and protein-membrane interactions. This is critical to robust trafficking, as early endosomes act as stable sorting centres of endocytosed material, from which cargo is redirected towards the plasma membrane or sent to late endosomes and lysosomal degradation. As a result, robust maturation of cargo-bearing vesicles is a requirement of the intracellular transport system.

Furthermore, it has become increasingly apparent that many diverse transmembrane receptors are able to signal from within endosomes (49–54) and that signal attenuation may rely on trafficking to distinct intracellular destinations or organelles (55, 56). This suggests that the trafficking and maturation rate of endosomes is intrinsically coupled to the downstream signal transduction of transmembrane receptors (55, 57, 58), further highlighting the importance of tightly regulated intracellular transport itineraries that include transport and maturation (11, 59).

Our work highlights the power of rapid volumetric imaging, coupled with an unbiased analysis pipeline and complemented by simulations, to capture and describe dynamical processes and thus unravel mechanisms in unperturbed systems. Importantly, this approach precludes the need for genetic and pharmacological alterations that lead to the establishment of a new steady state or phenotype, thereby potentially obscuring the very dynamics that are to be studied. Emergent phenomena are central to biological processes across scales, and there is increasing evidence for structure-function relationships that extend far beyond molecular scales to form larger-scale patterns in space and/or time. In the endosomal system, the biochemical process of conversion is underpinned by phosphoinositide chemistry at the individual endosome level; at a population level, however, it is governed by the physical process of stochastic collisions that forms an inherent part of the transport system of endosomes. Importantly, this suggests that the robustness of the intracellular transport network may not derive solely from so-called ‘master regulators’ but through the complex dynamic interactions of individually noisy components to create emergent reproducibility of large-scale processes.

## Methods

**Cell lines.** RPE1 and HeLa EEA1 knockout (KO) cells were incubated at 37 °C in 5% CO<sub>2</sub> in high glucose Dulbecco’s modified Eagle’s medium (DMEM) (Life Technologies), supplemented with 10% foetal bovine serum (FBS) and 1% penicillin and streptomycin (Life Technologies). Cells were seeded at a density of 200,000 per well in a six-well plate containing 25 mm or 5 mm glass coverslips.

**Live cell imaging.** Cells were imaged using a lattice light-sheet microscope (3i, Denver, CO, USA). Excitation was achieved using 488-nm and 560-nm diode lasers (MPB Communications) at 1–5% AOTF transmittance through an excitation objective (Special Optics 28.6× 0.7 NA 3.74-mm immersion lens) and detected by a Nikon CFI Apo LWD 25× 1.1 NA water immersion lens with a 2.5× tube lens. Live cells were imaged in 8 mL of 37 °C-heated DMEM and images acquired with 2× Hamamatsu Orca Flash 4.0 V2 sCMOS cameras.

**Plasmids and transfection.** Cells were transfected with pEGFPC1-human APPL1, a gift from Pietro De Camilli (Addgene plasmid #22198) (6); EEA1 TagRFP-T, a gift from Silvia Corvera (Addgene plasmid #42635) (18); EGFP-EEA1, a gift from Silvia Corvera (Addgene plasmid #42307) (34); EGFP-Rab5, a gift from Marci Scidmore (Addgene plasmid #49888); and mRFP-Rab5, a gift from Ari Helenius (Addgene plasmid #14437) (60). Cells were transfected with a total of 1 μg DNA (0.3 μg + 0.3 μg plasmid of interest + 0.4 μg blank DNA) using lipofectamine 3000 (Thermo Fisher Scientific). The DNA sequence for the N-terminal mutant of EEA1 carrying F41A and I42A, deficient in Rab5 binding, was synthesised and cloned into the TagRFP-T vector using the XhoI/BamHI sites. For the C-terminal binding mutant

carrying R1375A, the synthesised sequence was cloned into the TagRFP-T vector using the XhoI/BamHI sites. It has been reported that drastic over-expression of APPL1 or EEA1 results in colocalisation of APPL1 and EEA1 on Rab5 endosomes; we therefore optimised this concentration by screening for this artefact and choosing conditions where we observed no overlap of APPL1 and EEA1.

**SiRNA INPP4A.** RPE1 cells were transfected with APPL1-EGFP, EEA1-TagRFP, and either 10 nM INPP4A siRNA (AM16810, Thermo Fisher Scientific) or Silencer Negative Control siRNA (AM4611, Thermo Fisher Scientific) using lipofectamine 3000. ~24 h later the cells were imaged using epifluorescence microscopy (configuration as above). The cells were imaged sequentially with 100 ms exposure and at a rate of 3 s/frame for 20 min. The whole cell number of conversions within this window was reported for each condition.

**Fluorescence lifetime imaging.** RPE1 cells were transfected with either EGFP-EEA1 + mRFP-Rab5, EEA1 TagRFP-T + EGFP-Rab5, EEA1-NTmut TagRFP-T + EGFP-Rab5 or EEA1-CTmut TagRFP-T + EGFP-Rab5 and either fixed with 4% paraformaldehyde or imaged live. The cells were imaged using an SP8 Falcon (Leica Microsystems) with an 86× 1.2 NA objective. Fluorescence lifetime images were acquired upon sequential excitation at 488 nm and 560 nm using a tuneable pulsed white-light laser at 10% transmission, with emission collected at 500–550 nm and 580–630 nm, respectively, using two Leica HyD detectors. The GFP lifetimes were fitted using two-component fitting with  $\tau_1 = 1.006$  ns and  $\tau_2 = 2.600$  ns. The fixed images were analysed with pixel-wise lifetime fitting, and the live movies were analysed by separating the images into the two contributing fluorescence lifetime images.

**Drug addition.** Cells were incubated with 100 nM nocodazole in 8 mL DMEM for 5 min before and during imaging as indicated. Cells were similarly treated with 100 nM phorbol 12-myristate 13-acetate (PMA) (P1585, Sigma-Aldrich) 5 min before and during imaging as indicated. To selectively inhibit Vps34, cells were treated with 100 nM SAR405 (533063, Sigma-Aldrich) for 2 h prior to imaging and throughout the experiment.

**PI(3)P staining.** To visualise PI(3)P localisation in relation to EEA1, immunofluorescence staining was performed as described previously (39). Briefly, RPE1 cells were transfected with EGFP-EEA1 and mRFP-Rab5 and fixed in 2% PFA. These cells were then permeabilised using 20  $\mu$ M digitonin for 5 min and labelled with 8  $\mu$ g/mL recombinant GST-2xFYVE (61) which was detected using a GST primary antibody (71-7500, Invitrogen) and a Goat anti-Rabbit AlexaFluor647 secondary antibody (A-21245, Thermo Fisher Scientific). These cells were then imaged using an SP8 Falcon as above, with the PI(3)P being detected using 647 nm excitation and emission collected at 660–700 nm, using a Leica HyD detector.

**Super resolution by radial fluctuations (SRRF).** RPE1 cells transfected with APPL1-EGFP and EEA1-TagRFP were stimulated with 100 nM PMA as detailed above. The cells were then imaged using widefield fluorescence microscopy with a Nikon Ti-2E body, 100× 1.5 NA objective (Olympus) and Prime 95B camera (Photometrics). Images were captured in 100 frame bursts with 5 ms exposure for each channel sequentially every 2 s for ~1 min image periods. The images were then processed using the SRRF plugin for Fiji (32, 62).

**Segmentation and tracking analysis.** Datasets analysed consisted of LLSM six movies of untreated and two movies of nocodazole-treated RPE1 cells. Images were first deskewed, then adaptive histogram equalisation and a median filter applied prior to blob detection using the Laplacian of Gaussian operator. The expected range of object sizes were supplied as an independent parameter for each fluorescence channel, with other parameters tuned to return a preliminary set of over-detected blobs, defined by centres of mass and approximate radii. From these data, representative regions denoting endosomes and background, respectively, were chosen from each movie in an unsupervised manner (by choosing the brightest and dimmest blobs, respectively); these regions were then used as templates to calculate cross-correlations against each candidate endosome. The results of this operation define a set of features for each object, which were used as inputs to a *k*-means clustering algorithm to classify objects into endosomes versus background (Supplementary Figure 1).

A custom tracking routine built on trackpy and using both localisation and intensity information was then used to link objects into complete trajectories, independently for each channel. Events of interest were then calculated by trajectory analysis. Correlated trajectories were classified as potential conversions (11, 59), with stringent filters applied to exclude any events not clearly representative of APPL1 to EEA1 conversions (Supplementary Figure 2a). To identify heterotypic collisions, local trajectories of neighbouring APPL1-EEA1 pairs were used to calculate the pairwise inter-endosome distance (separation between surfaces of nearby APPL1 and EEA1 endosomes along the line connecting their centres of mass). Local minima in the inter-endosome distance below a threshold value (within 200 nm, or roughly two pixels of overlap in the lateral dimension) were classified as collisions. These values were subsequently filtered to ensure that conversion-like events were excluded from the set of heterotypic collisions (Supplementary Figure 2b). Events showing APPL1 to EEA1 conversions were classified as fusions or conversions, respectively based on whether or not the particular EEA1 track existed prior to colocalisation with APPL1. Events were classified as collision-induced versus unaided based on whether the APPL1 endosome collided with any EEA1 endosome in the 30 s prior to the event (Supplementary Figure 2c).

**Photo-Activated Localisation Microscopy (PALM).** Dendra-2 EEA1 was generated by replacing TagRFP-T in



RagRFP-T EEA1 (Addgene plasmid #42635) at cloning sites AgeI and XhoI. Cells transfected with Dendra-2 EEA1 were fixed using 0.2% glutaraldehyde and 4% PFA in cytoskeletal buffer (10 mM MES, 150 mM NaCl, 5 mM EDTA, 5 mM glucose and 5 mM MgCl<sub>2</sub>) for 15 min at room temperature. The cells were washed gently three times with PBS. PALM microscopy was carried out with a Nikon N-STORM microscope with a 100× oil immersion objective (1.49 NA) with a cylindrical lens for 3D localisation. A 488-nm laser beam was used for pre-converted Dendra-2 excitation, with 405 nm for photoconversion and a 561-nm beam for post-photo converted Dendra-2. Localisations were exported to ViSP for visual examination and generating depth colour-coded images (63).

**Simulations.** The endosome's surface was simulated as a bilayered Fibonacci Sphere (a spherical grid in which neighbouring points are approximately equidistant). One layer consisted of Rab5 and the other PI(3,4)P2 or PI(3)P. The agents (APPL1, INPP4A, and N- and C-terminally attached EEA1) were allowed to stochastically attach and detach according to the schematic shown in Figure 7a. The attachment rates increased with the number of neighbouring agents of the same type (cluster attach), and detachment rates increased with the number of neighbouring agents of the same type that detached recently (cluster detach). In addition, INPP4A had a fixed probability of converting PI(3,4)P2 to PI(3)P, and a fixed probability of jumping to another nearby free PI(3,4)P2 after conversion. Upon collision, a fixed number of EEA1 N-terminal attachments were added to the endosome according to the availability of free Rab5 in a short time window after the collision. The conversion time of the endosome was measured as the first passage time of the fraction of PI(3,4)P2 converted to PI(3)P crossing a fixed threshold (set at 60%). See Supplementary Material for details.

#### ACKNOWLEDGMENTS

The experimental work presented here was partially supported by the National Health and Medical Research Council of Australia (APP1182212) and ARC LIEF (LE150100163). H.M.Y. is supported by an Australian Government Research Training (RTP) Scholarship. A.P. and U.K.M. are supported by Monash Biomedicine Discovery Institute Scholarships. The EMBL Australia Partnership Laboratory (EMBL Australia) is supported by the National Collaborative Research Infrastructure Strategy of the Australian Government. The authors gratefully acknowledge the Imaging, FACS and Analysis Core and Cameron Nowell at Monash Institute of Pharmaceutical Science for their instrumentation and technical support. S.I.-B., K.J., and C.S.W. thank the Purdue Research Foundation, Purdue University start-up funds, and the Ross-Lynn Fellowship award for financial support. S.A. thanks Marino Zerial for the kind gift of HeLa EEA1 KO cell line and Samuel Rodgers for discussions. S.A. and S.I.-B. thank all members of the Arumugam and Iyer-Biswas groups who contributed to discussions and gave feedback on the manuscript.

#### AUTHOR CONTRIBUTIONS

S.A. conceived of and designed the experiments and oversaw all aspects of the project; S.I.-B. directed the theory efforts, simulations, and the development of the automated analysis pipeline; H.M.Y., U.K.M., and S.A. performed LLSM experiments, H.M.Y. performed fluorescence lifetime experiments; S.R., C.M., and H.M.Y. performed PI(3)P staining experiments; H.M.Y. and S.A. performed super-resolution experiments; H.M.Y., K.J., C.S.W., H.G., A.P., L.Z.K., and S.A. analysed the data; K.J. performed agent-based simulations to propose, verify, and fine-tune mechanism under the guidance of S.I.-B.; C.S.W. developed the automated detection, tracking, and analysis pipeline and workflow under the guidance of S.I.-B.; S.A., H.M.Y., U.K.M., and H.G. contributed to molecular biology; and H.M.Y., K.J., C.S.W., S.I.-B., and S.A. discussed results, helped shape the research and analysis, and wrote the manuscript.

## Bibliography

1. C.J. Marshall. Specificity of receptor tyrosine kinase signaling: Transient versus sustained extracellular signal-regulated kinase activation. *Cell*, 80:179–185, 1995. ISSN 00928674. doi: 10.1016/0092-8674(95)90401-8.
2. Kazuhiro A. Fujita, Yu Toyoshima, Shinsuke Uda, Yu ichi Ozaki, Hiroyuki Kubota, and Shinya Kuroda. Decoupling of receptor and downstream signals in the akt pathway by its low-pass filter characteristics. *Science Signaling*, 3(132):ra56–ra56, 2010. doi: 10.1126/scisignal.2000810.
3. Aneta Koseska and Philippe I.H. Bastiaens. Processing temporal growth factor patterns by an epidermal growth factor receptor network dynamically established in space. *Annual Review of Cell and Developmental Biology*, 36(1):359–383, 2020. doi: 10.1146/annurev-cellbio-013020-103810. PMID: 32692593.
4. Jatta Huotari and Ari Helenius. Endosome maturation. *The EMBO Journal*, 30(17):3481–3500, 2011. doi: <https://doi.org/10.1038/emboj.2011.286>.
5. Jochen Rink, Eric Ghigo, Yannis Kalaidzidis, and Marino Zerial. Rab conversion as a mechanism of progression from early to late endosomes. *Cell*, 122:735–749, 9 2005. ISSN 00928674. doi: 10.1016/j.cell.2005.06.043.
6. Roberto Zoncu, Rushika M. Perera, Daniel M. Balkin, Michelle Pirruccello, Derek Toomre, and Pietro De Camilli. A phosphoinositide switch controls the maturation and signaling properties of appl endosomes. *Cell*, 136:1110–1121, 3 2009. ISSN 00928674. doi: 10.1016/j.cell.2009.01.032.
7. Jez G. Carlton and Peter J. Cullen. Coincidence detection in phosphoinositide signaling. *Trends in Cell Biology*, 15:540–547, 10 2005. ISSN 09628924. doi: 10.1016/j.tcb.2005.08.005.
8. Hye Won Shin, Mitsuko Hayashi, Savvas Christoforidis, Sandra Lacas-Gervais, Sebastian Hoepfner, Markus R. Wenk, Jan Modregger, Sandrine Uttenweiler-Joseph, Matthias Wilim, Arne Nystuen, Wayne N. Frankel, Michele Solimena, Pietro De Camilli, and Marino Zerial. An enzymatic cascade of rab5 effectors regulates phosphoinositide turnover in the endocytic pathway. *Journal of Cell Biology*, 170:607–618, 8 2005. ISSN 00219525. doi: 10.1083/jcb.200505128.
9. Alexander Wallroth and Volker Haucke. Phosphoinositide conversion in endocytosis and the endolysosomal system. *Journal of Biological Chemistry*, 293:1526–1535, 2 2018. ISSN 1083351X. doi: 10.1074/jbc.R117.000629.
10. Owen J. Driskell, Aleksandr Mironov, Victoria J. Allan, and Philip G. Woodman. Dynein is required for receptor sorting and the morphogenesis of early endosomes. *Nature Cell Biology*, 9:113–120, 1 2007. ISSN 1465-7392. doi: 10.1038/ncb1525.
11. H. M. York, A. Patil, U. K. Moorthi, A. Kaur, A. Bhowmik, G. J. Hyde, H. Gandhi, A. Fulcher, K. Gaus, and S. Arumugam. Rapid whole cell imaging reveals a calcium-appl1-dynein nexus that regulates cohort trafficking of stimulated egf receptors. *Communications Biology*, 4:224, 2 2021. ISSN 2399-3642. doi: 10.1038/s42003-021-01740-y.
12. F. Anderson Norris, Vorachart Auethavekiat, and Philip W. Majerus. The isolation and characterization of cDNA encoding human and rat brain inositol polyphosphate 4-phosphatase. *Journal of Biological Chemistry*, 270:16128–16133, 7 1995. ISSN 00219258. doi: 10.1074/jbc.270.27.16128.
13. F. Anderson Norris, Robert C. Atkins, and Philip W. Majerus. The cDNA cloning and characterization of inositol polyphosphate 4-phosphatase type ii. *Journal of Biological Chemistry*, 272:23859–23864, 9 1997. ISSN 00219258. doi: 10.1074/jbc.272.38.23859.
14. Haibin Wang, Dinah Loerke, Caroline Bruns, Rainer Müller, Philipp-Alexander Koch, Dmytro Puchkov, Carsten Schultz, and Volker Haucke. Phosphatidylinositol 3,4-bisphosphate synthesis and turnover are spatially segregated in the endocytic pathway. *Journal of Biological Chemistry*, 295:1091–1104, 1 2020. ISSN 0021-9258. doi: 10.1074/jbc.RA119.011774.
15. Quentin Vagne and Pierre Sens. Stochastic model of maturation and vesicular exchange in cellular organelles. *Biophysical Journal*, 114:947–957, 2 2018. ISSN 00063495. doi: 10.1016/j.bpj.2017.12.018.
16. Bi-Chang Chen, Wesley R. Legant, Kai Wang, Lin Shao, Daniel E. Milkie, Michael W. Davidson, Chris Janetopoulos, Xufeng S. Wu, John A. Hammer, Zhe Liu, Brian P. English, Yuko Mimori-Kiyosue, Daniel P. Romero, Alex T. Ritter, Jennifer Lippincott-Schwartz, Lillian Fritz-Laylin, R. Dyche Mullins, Diana M. Mitchell, Joshua N. Bembek, Anne-Cecile Reyman, Ralph Böhme, Stephan W. Grill, Jennifer T. Wang, Geraldine Seydoux, U. Serdar Tulu, Daniel P. Kiehart, and Eric Betzig. Lattice light-sheet microscopy: Imaging molecules to embryos at high spatiotemporal resolution. *Science*, 346:1257998, 10 2014. ISSN 0036-8075. doi: 10.1126/science.1257998.
17. Kai S. Erdmann, Yuxin Mao, Heather J. McCrear, Roberto Zoncu, Sangyoon Lee, Summer Paradise, Jan Modregger, Daniel Biemesderfer, Derek Toomre, and Pietro De Camilli. A role of the lowy syndrome protein ocr1 in early steps of the endocytic pathway. *Developmental Cell*, 13:377–390, 9 2007. ISSN 15345807. doi: 10.1016/j.devcel.2007.08.004.
18. Deanna M. Navaroli, Karl D. Bellvé, Clive Standley, Lawrence M. Lifshitz, James Cardia, David Lambright, Deborah Leonard, Kevin E. Fogarty, and Silvia Corvera. Rabenosyn-5 defines the fate of the transferrin receptor following clathrin-mediated endocytosis. *Proceedings of the National Academy of Sciences*, 109, 2 2012. ISSN 0027-8424. doi: 10.1073/pnas.1115495109.
19. Daniel B. Allan, Thomas Caswell, Nathan C. Keim, Casper M. van der Wel, and Ruben W. Verweij. soft-matter/trackpy: Trackpy v0.5.0, April 2021.
20. Inna Kalaidzidis, Marta Miaczynska, Marta Brawińska-Olchowik, Anna Hupalowska, Charles Ferguson, Robert G. Parton, Yannis Kalaidzidis, and Marino Zerial. Appl endosomes are not obligatory endocytic intermediates but act as stable cargo-sorting compartments. *Journal of Cell Biology*, 211:123–144, 10 2015. ISSN 0021-9525. doi: 10.1083/jcb.201311117.
21. David H. Murray, Marcus Jahnle, Janelle Lauer, Mario J. Avellaneda, Nicolas Brouilly, Alice Cezanne, Hernán Morales-Navarrete, Enrico D. Perini, Charles Ferguson, Andrei N. Lupas, Yannis Kalaidzidis, Robert G. Parton, Stephan W. Grill, and Marino Zerial. An endosomal tether undergoes an entropic collapse to bring vesicles together. *Nature*, 537:107–111, 9 2016. ISSN 0028-0836. doi: 10.1038/nature19326.
22. Ian G. Mills, Arwyn T. Jones, and Michael J. Clague. Involvement of the endosomal autophagy-related protein eea1 in homotypic fusion of early endosomes. *Current Biology*, 8:881–884, 7

1998. ISSN 09609822. doi: 10.1016/S0960-9822(07)00351-X.
23. Judy Callaghan, Anne Simonsen, Jean-Michel Gaullier, Ban-Hock Toh, and Harald Stenmark. The endosome fusion regulator early-endosomal autoantigen 1 (eea1) is a dimer. *Biochemical Journal*, 338:539, 3 1999. ISSN 02646021. doi: 10.1042/0264-6021.3380539.
24. John J. Dumas, Eric Merithew, E. Sudharshan, Deepa Rajamani, Susan Hayes, Deirdre Lawe, Silvia Corvera, and David G. Lambright. Multivalent endosome targeting by homodimeric eea1. *Molecular Cell*, 8:947–958, 11 2001. ISSN 10972765. doi: 10.1016/S1097-2765(01)00385-9.
25. Allison L. Zajac, Yale E. Goldman, Erika L.F. Holzbaur, and E. Michael Ostap. Local cytoskeletal and organelle interactions impact molecular-motor-driven early endosomal trafficking. *Current Biology*, 23:1173–1180, 7 2013. ISSN 09609822. doi: 10.1016/j.cub.2013.05.015.
26. Birte Sönnichsen, Stefano De Renzi, Erik Nielsen, Jens Rietdorf, and Marino Zerial. Distinct membrane domains on endosomes in the recycling pathway visualized by multicolor imaging of rab4, rab5, and rab11. *Journal of Cell Biology*, 149:901–914, 5 2000. ISSN 0021-9525. doi: 10.1083/jcb.149.4.901.
27. Suzanne Pfeffer. Membrane domains in the secretory and endocytic pathways. *Cell*, 112:507–517, 2 2003. ISSN 00928674. doi: 10.1016/S0092-8674(03)00118-1.
28. Ashim Rai, Divya Pathak, Shreyasi Thakur, Shampa Singh, Alok Kumar Dubey, and Roop Mallik. Dynein clusters into lipid microdomains on phagosomes to drive rapid transport toward lysosomes. *Cell*, 164:722–734, 2 2016. ISSN 00928674. doi: 10.1016/j.cell.2015.12.054.
29. Christian Franke, Urska Repnik, Sandra Segeletz, Nicolas Brouilly, Yannis Kalaidzidis, Jean-Marc Verbatz, and Marino Zerial. Correlative single-molecule localization microscopy and electron tomography reveals endosome nanoscale domains. *Traffic*, 20:601–617, 8 2019. ISSN 1398-9219. doi: 10.1111/tra.12671.
30. Laura Picas, Julien Viaud, Kristine Schauer, Stefano Vanni, Karim Hnia, Vincent Fraisier, Aurélien Roux, Patricia Bassereau, Frédérique Gaits-lacovoni, Bernard Payrastre, Jocelyn Laporte, Jean-Baptiste Manneville, and Bruno Goud. Bin1/m-amphiphysin2 induces clustering of phosphoinositides to recruit its downstream partner dynamin. *Nature Communications*, 5:5647, 12 2014. ISSN 2041-1723. doi: 10.1038/ncomms5647.
31. Dmitriy M. Chudakov, Sergey Lukyanov, and Konstantin A. Lukyanov. Using photoactivatable fluorescent protein dendra2 to track protein movement. *BioTechniques*, 42:553–563, 5 2007. ISSN 0736-6205. doi: 10.2144/000112470.
32. Siân Culley, Kalina L. Tosheva, Pedro Matos Pereira, and Ricardo Henriques. Srrf: Universal live-cell super-resolution microscopy. *The International Journal of Biochemistry & Cell Biology*, 101:74–79, 8 2018. ISSN 13572725. doi: 10.1016/j.ijbc.2018.05.014.
33. Deirdre C. Lawe, Anil Chawla, Eric Merithew, John Dumas, Walter Carrington, Kevin Fogarty, Lawrence Lifshitz, Richard Tuft, David Lambright, and Silvia Corvera. Sequential roles for phosphatidylinositol 3-phosphate and rab5 in tethering and fusion of early endosomes via their interaction with eea1. *Journal of Biological Chemistry*, 277:8611–8617, 3 2002. ISSN 00219258. doi: 10.1074/jbc.M109239200.
34. Deirdre C. Lawe, Varsha Patki, Robin Heller-Harrison, David Lambright, and Silvia Corvera. The fyve domain of early endosome antigen 1 is required for both phosphatidylinositol 3-phosphate and rab5 binding. *Journal of Biological Chemistry*, 275:3699–3705, 2 2000. ISSN 00219258. doi: 10.1074/jbc.275.5.3699.
35. Mariantonieta Rubino, Marta Mieczynska, Roger Lippé, and Marino Zerial. Selective membrane recruitment of eea1 suggests a role in directional transport of clathrin-coated vesicles to early endosomes. *Journal of Biological Chemistry*, 275:3745–3748, 2 2000. ISSN 00219258. doi: 10.1074/jbc.275.6.3745.
36. Ashwini Mishra, Sudharshan Eathiraj, Silvia Corvera, and David G. Lambright. Structural basis for rab gtpase recognition and endosome tethering by the c<sub>2</sub>h<sub>2</sub> zinc finger of early endosomal autoantigen 1 (eea1). *Proceedings of the National Academy of Sciences*, 107:10866–10871, 6 2010. ISSN 0027-8424. doi: 10.1073/pnas.1000843107.
37. Andreas Haahr Larsen, Lilya Tata, Laura H. John, and Mark S. P. Sansom. Membrane-binding mechanism of the eea1 fyve domain revealed by multi-scale molecular dynamics simulations. *PLOS Computational Biology*, 17:e1008807, 9 2021. ISSN 1553-7358. doi: 10.1371/journal.pcbi.1008807.
38. D J Gillooly, I C Morrow, M Lindsay, R Gould, N J Bryant, J M Gaullier, R G Parton, and H Stenmark. Localization of phosphatidylinositol 3-phosphate in yeast and mammalian cells. *The EMBO Journal*, 19:4577–88, 9 2000. ISSN 0261-4189. doi: 10.1093/emboj/19.17.4577.
39. Samuel J. Rodgers, Lisa M. Ooms, Viola M. J. Oorschot, Ralf B. Schittenhelm, Elizabeth V. Nguyen, Sabrynn A. Hamila, Natalie Rynkiewicz, Rajendra Gurung, Matthew J. Eramo, Ab-sorn Sritatana, Clare G. Fedele, Franco Caramia, Sherene Loi, Genevieve Kerr, Helen E. Abud, Georg Ramm, Antonella Papa, Andrew M. Ellsison, Roger J. Daly, Catriona A. McLean, and Christina A. Mitchell. Inpp4b promotes pi3kα-dependent late endosome formation and wnt/β-catenin signaling in breast cancer. *Nature Communications*, 12:3140, 5 2021. ISSN 2041-1723. doi: 10.1038/s41467-021-23241-6.
40. Harald Stenmark, Rein Aasland, Ban-Hock Toh, and Antonello D'Arrigo. Endosomal localization of the autoantigen eea1 is mediated by a zinc-binding fyve finger. *Journal of Biological Chemistry*, 271:24048–24054, 9 1996. ISSN 00219258. doi: 10.1074/jbc.271.39.24048.
41. Jean-Michel Gaullier, Eva Ronning, David J. Gillooly, and Harald Stenmark. Interaction of the eea1 fyve finger with phosphatidylinositol 3-phosphate and early endosomes. *Journal of Biological Chemistry*, 275:24595–24600, 8 2000. ISSN 00219258. doi: 10.1074/jbc.M906554199.
42. Karine Lindmo and Harald Stenmark. Regulation of membrane traffic by phosphoinositide 3-kinases. *Journal of Cell Science*, 119:605–614, 2 2006. ISSN 1477-9137. doi: 10.1242/jcs.02855.
43. Jonathan M. Backer. The regulation and function of class iii pi3ks: novel roles for vps34. *Biochemical Journal*, 410:1–17, 2 2008. ISSN 0264-6021. doi: 10.1042/BJ20071427.
44. Baptiste Ronan, Odile Flamand, Lionel Vescovi, Christine Dureuil, Laurence Durand, Florence Fassy, Marie-France Bachelot, Annabelle Lambertson, Magali Mathieu, Thomas Bertrand, Jean-Pierre Marquette, Youssef El-Ahmad, Bruno Filoche-Romme, Laurent Schio, Carlos Garcia-Echeverria, Hélène Goulaouic, and Benoit Pasquier. A highly potent and selective vps34 inhibitor alters vesicle trafficking and autophagy. *Nature Chemical Biology*, 10:1013–1019, 12 2014. ISSN 1552-4450. doi: 10.1038/nchembio.1681.
45. Eric Merithew, Craig Stone, Sudharshan Eathiraj, and David G. Lambright. Determinants of rab5 interaction with the n terminus of early endosome antigen 1. *Journal of Biological Chemistry*, 278:8494–8500, 3 2003. ISSN 00219258. doi: 10.1074/jbc.M211514200.
46. I.G. Mills, S. Urbe, and M.J. Clague. Relationships between eea1 binding partners and their role in endosome fusion. *Journal of Cell Science*, 114:1959–1965, 5 2001. ISSN 1477-9137. doi: 10.1242/jcs.114.10.1959.
47. Deirdre C. Lawe, Nachida Sitouah, Susan Hayes, Anil Chawla, Joseph V. Virbasius, Richard Tuft, Kevin Fogarty, Lawrence Lifshitz, David Lambright, and Silvia Corvera. Essential role of ca<sup>2+</sup>/calmodulin in early endosome antigen-1 localization. *Molecular Biology of the Cell*, 14:2935–2945, 7 2003. ISSN 1059-1524. doi: 10.1091/mbc.e02-09-0591.
48. Enrico D. Perini, Ramona Schaefer, Martin Stöter, Yannis Kalaidzidis, and Marino Zerial. Mammalian corvet is required for fusion and conversion of distinct early endosome subpopulations. *Traffic*, 15:1366–1389, 12 2014. ISSN 13989219. doi: 10.1111/tra.12232.
49. Mark L. Grimes, Jie Zhou, Eric C. Beattie, Eric C. Yuen, Deborah E. Hall, Janice S. Valletta, Kimberly S. Topp, Jennifer H. LaVail, Nigel W. Bunnett, and William C. Mobley. Endocytosis of activated trka: Evidence that nerve growth factor induces formation of signaling endosomes. *The Journal of Neuroscience*, 16:7950–7964, 12 1996. ISSN 0270-6474. doi: 10.1523/JNEUROSCI.16-24-07950.1996.
50. H. Steven Wiley and Patrick M. Burke. Regulation of receptor tyrosine kinase signaling by endocytic trafficking. *Traffic*, 2:12–18, 1 2001. ISSN 13989219. doi: 10.1034/j.1600-0854.2001.020103.x.
51. Yi Wang, Steven Pennock, Xinmei Chen, and Zhixiang Wang. Endosomal signaling of epidermal growth factor receptor stimulates signal transduction pathways leading to cell survival. *Molecular and Cellular Biology*, 22:7279–7290, 10 2002. ISSN 0270-7306. doi: 10.1128/MCB.22.20.7279-7290.2002.
52. Gianni M. Di Guglielmo, Christine Le Roy, Anne F. Goodfellow, and Jeffrey L. Wrana. Distinct endocytic pathways regulate tgf-β receptor signalling and turnover. *Nature Cell Biology*, 5:410–421, 5 2003. ISSN 1465-7392. doi: 10.1038/ncb975.
53. Maximilian Fürthauer and Marcos González-Gaitán. Endocytic regulation of notch signalling during development. *Traffic*, 10:792–802, 7 2009. ISSN 13989219. doi: 10.1111/j.1600-0854.2009.00914.x.
54. Roshanak Irannejad, Jin C. Tomshine, Jon R. Tomshine, Michael Chevalier, Jacob P. Mahoney, Jan Steyaert, Søren G. F. Rasmussen, Roger K. Sunahara, Hana El-Samad, Bo Huang, and Mark von Zastrow. Conformational biosensors reveal gpcr signalling from endosomes. *Nature*, 495:534–538, 3 2013. ISSN 0028-0836. doi: 10.1038/nature12000.
55. Alexander Sorkin and Mark von Zastrow. Endocytosis and signalling: intertwining molecular networks. *Nature Reviews Molecular Cell Biology*, 10:609–622, 9 2009. ISSN 1471-0072. doi: 10.1038/nrm2748.
56. Angel Stanovec, Amit Mhamane, Klaus C. Schuermann, Hernán E. Grecco, Wayne Stallaert, Martin Baumdick, Yannick Brüggemann, Maitreyi S. Joshi, Pedro Roda-Navarro, Sven Fentler, Rabea Stockert, Lisaweta Roßmannek, Jutta Luig, Aneta Kodeska, and Philippe I.H. Bastiaens. Interdependence between egfr and phosphatases spatially established by vesicular dynamics generates a growth factor sensing and responding network. *Cell Systems*, 7:295–309.e11, 9 2018. ISSN 24054712. doi: 10.1016/j.cels.2018.06.006.
57. Giorgio Scita and Pier Paolo Di Fiore. The endocytic matrix. *Nature*, 463:464–473, 1 2010. ISSN 0028-0836. doi: 10.1038/nature08910.
58. Roberto Villaseñor, Yannis Kalaidzidis, and Marino Zerial. Signal processing by the endosomal system. *Current Opinion in Cell Biology*, 39:53–60, 4 2016. ISSN 09550674. doi: 10.1016/j.cob.2016.02.002.
59. Charles L. Howe. Modeling the signaling endosome hypothesis: Why a drive to the nucleus is better than a (random) walk. *Theoretical Biology and Medical Modelling*, 2:43, 12 2005. ISSN 1742-4682. doi: 10.1186/1742-4682-2-43.
60. Andreas Vonderheit and Ari Helenius. Rab7 associates with early endosomes to mediate sorting and transport of semliki forest virus to late endosomes. *PLoS Biology*, 3:e233, 6 2005. ISSN 1545-7885. doi: 10.1371/journal.pbio.0030233.
61. Monica J. Naughtin, David A. Sheffield, Parvin Rahman, William E. Hughes, Rajendra Gurung, Jennifer L. Stow, Harshal H. Nandurkar, Jennifer M. Dyson, and Christina A. Mitchell. The myotubularin phosphatase mtrm4 regulates sorting from early endosomes. *Journal of Cell Science*, 123:3071–3083, 9 2010. ISSN 1477-9137. doi: 10.1242/jcs.060103.
62. Romain F. Laine, Kalina L. Tosheva, Nils Gustafsson, Robert D M Gray, Pedro Almada, David Albrecht, Gabriel T Risa, Fredrik Hurtig, Ann-Christin Lindås, Buzz Baum, Jason Mercer, Christophe Leterrier, Pedro M Pereira, Siân Culley, and Ricardo Henriques. Nanoj: a high-performance open-source super-resolution microscopy toolbox. *Journal of Physics D: Applied Physics*, 52:163001, 4 2019. ISSN 0022-3727. doi: 10.1088/1361-6463/ab0261.
63. Mohamed El Beheiry and Maxime Dahan. Visp: representing single-particle localizations in three dimensions. *Nature Methods*, 10:689–690, 8 2013. ISSN 1548-7091. doi: 10.1038/nmeth.2566.

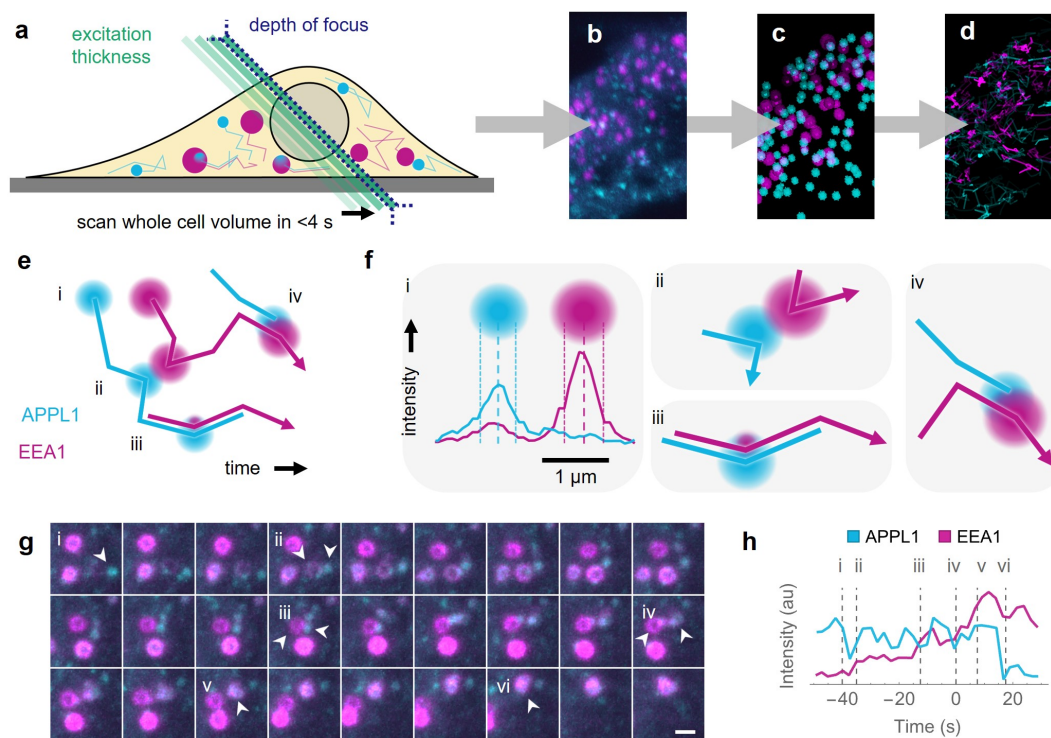

**Fig. 1. Image analysis pipeline to measure ensemble endosome characteristics.** **a)** APPL1-EGFP and TagRFP-T EEA1 were imaged using LLSM at 2.5 s/volume. **b)** Representative image of raw data, representing a single zoomed frame of a whole cell volume lasting up to  $\sim 30$  minutes. **c)** Preliminary endosomes in each channel were identified separately by blob detection then an unsupervised pattern recognition-based routine was used to identify true endosomes, following by **d)** linking based on localisation and intensity values to construct complete trajectories with continuous spatial data and intensity traces. **e)** Trajectories of endosomes identified from opposite channels were then analysed together to identify of events of interest (i–iv). **f)** Schematic showing the protocols used to detect each type of event. (i) The intensity profile between two endosomes (cyan: APPL1, magenta: EEA1) along the line connecting their centres of mass is shown. Dashed line indicates centre of mass; dotted lines indicate endosome boundaries determined by detection routine. Changes in surface-to-surface distances between pairs of nearby events are used to identify events, with (ii) collisions defined as the point of nearest approach, if below the threshold for surface-to-surface separation and (iii) conversions calculated by identifying regions of colocalised trajectories; (iv) such events are considered to be fusions if the EEA1 track that remains after the disappearance of the APPL1 track existed as a distinct tracked object prior to the colocalisation event. **g)** Montage showing (i) a single APPL1 endosome that collides with (ii) a dim EEA1 endosome and separates, then collides with (iii) a brighter EEA1 endosome and separates, (iv) collides again with the same EEA1 endosome then (v) separates, at which point EEA1 levels are significantly elevated; by (vi) APPL1 is no longer independently detected. Scale bar = 1  $\mu\text{m}$ . **h)** Intensity traces corresponding to Figure 1g with events indicated by dotted vertical lines. Time is reported relative to the start of APPL1–EEA1 colocalisation; intensity is reported as the average value of each channel's intensity over the pixels detected by APPL1 detection until the end of localisation, and by EEA1 detection thereafter.

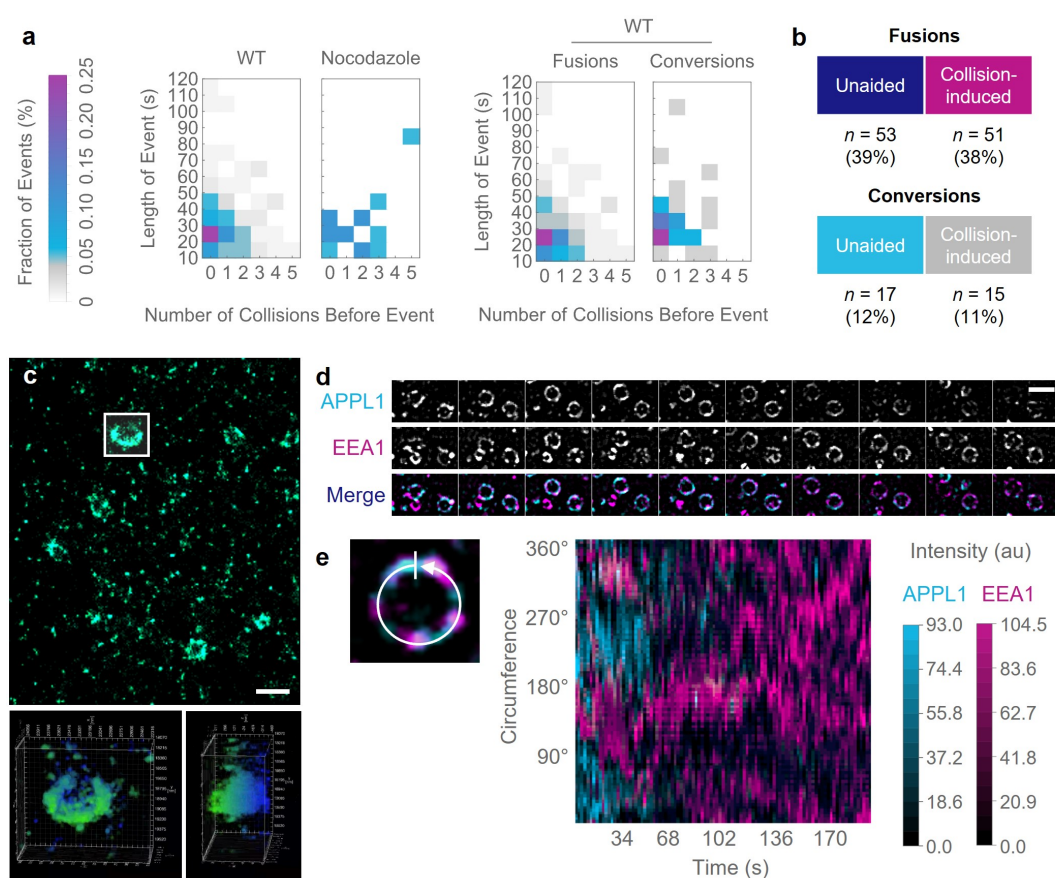

**Fig. 2. High temporal- and spatial-resolution data reveal that heterotypic APPL1–EEA1 collisions play a causal role in early endosomal maturation, with APPL1 and EEA1 showing dynamic counter-clustering.** **a**) Heatmap of the fraction of events that fall into cohorts defined by the total duration of colocalisation (in 10-s bins) and the number of heterotypic collisions immediately preceding the event. (*Left*) All events are shown for wild-type (WT) and nocodazole-treated cells. (*Right*) WT data are further split according to fusions and conversions. Importantly, in WT cells, longer durations of colocalisation are notably less frequent in those cases where multiple collisions occur. Note that nocodazole events represent fusions only, as no conversions were detected for these cells. Total events for each condition are WT ( $n = 127$ )—which is further segmented into fusions ( $n = 96$ ) and conversions ( $n = 32$ )—and nocodazole-treated ( $n = 18$ ). **b**) Numbers of events observed in each category: unaided fusions (39%), collision-induced fusions (38%), unaided conversions (12%), and collision-induced conversions (11%). Strict criteria were applied to filter the collisions; thus, we consider the values reported here for collision-induced events to likely represent a conservative estimate. **c**) APPL1 and EEA1 exhibit dynamic counter-clustering when imaged using super-resolution microscopy. 3D PALM imaging of Dendra2-EEA1 shown as a maximum intensity projection (*top*) and as a 3D volume (*bottom*). Intensity is colour-coded to  $z$  position. Scale bar =  $1 \mu\text{m}$ . **d**) Kymograph of line intensity plot of normalised APPL1 (*cyan*) and EEA1 (*magenta*) intensity of a converting APPL1 endosome imaged with SRRF, after processing. Circumference position in degrees is plotted on the  $y$  axis, as indicated in the schematic (*left*), and time in seconds is plotted on the  $x$  axis. **e**) Montage of live SRRF experiment showing dynamic APPL1 (*cyan*) and EEA1 (*magenta*) clustering. Scale bar =  $1 \mu\text{m}$ .

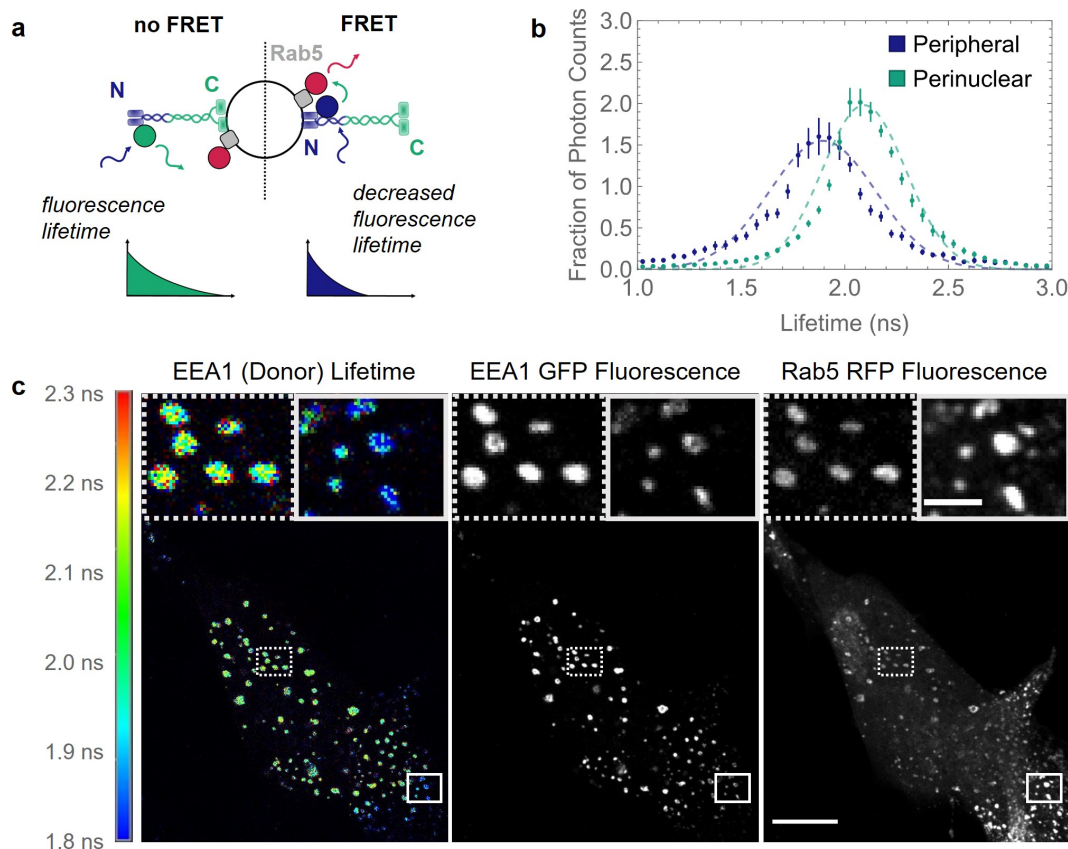

**Fig. 3. EEA1 endosomes exist in two spatially distinct populations characterised by opposite membrane binding.** **a**) Schematic diagram of EEA1 FLIM experiment logic. Shorter fluorescence lifetime (*right*) indicates a FRET interaction between EEA1-EGFP and Rab5-RFP and therefore indicates EEA1 is bound via its N-terminal binding domain. Correspondingly, longer fluorescence lifetime (*left*) indicates no FRET interaction and thus that EEA1 is bound via its C-terminal binding domains to the membrane. **b**) Normalised frequency histograms of the detected fluorescence lifetimes of EEA1-EGFP photons measured in peripheral endosomes (*blue*) and perinuclear endosomes (*green*); bars represent standard errors of the mean; dashed curves show Gaussian fits for reference. Mean lifetimes calculated from these data are 1.87 ns and 2.10 ns for the peripheral and perinuclear curves, respectively. Endosomes were measured across  $n = 6$  cells. **c**) Representative FLIM-FRET experiments of RPE1 cells transfected with EEA1-EGFP and Rab5-RFP. Coloured scale bar represents donor lifetime ranging from 1.8 ns (*blue*) to 2.3 ns (*red*). Left panel shows the FLIM image of EEA1 (donor) lifetime, middle panel shows EEA1 fluorescence intensity, and right panel shows Rab5 fluorescence intensity; boxes indicate the regions of the zoomed insert. Scale bar = 10 μm. Zoomed insert scale bar = 1 μm.

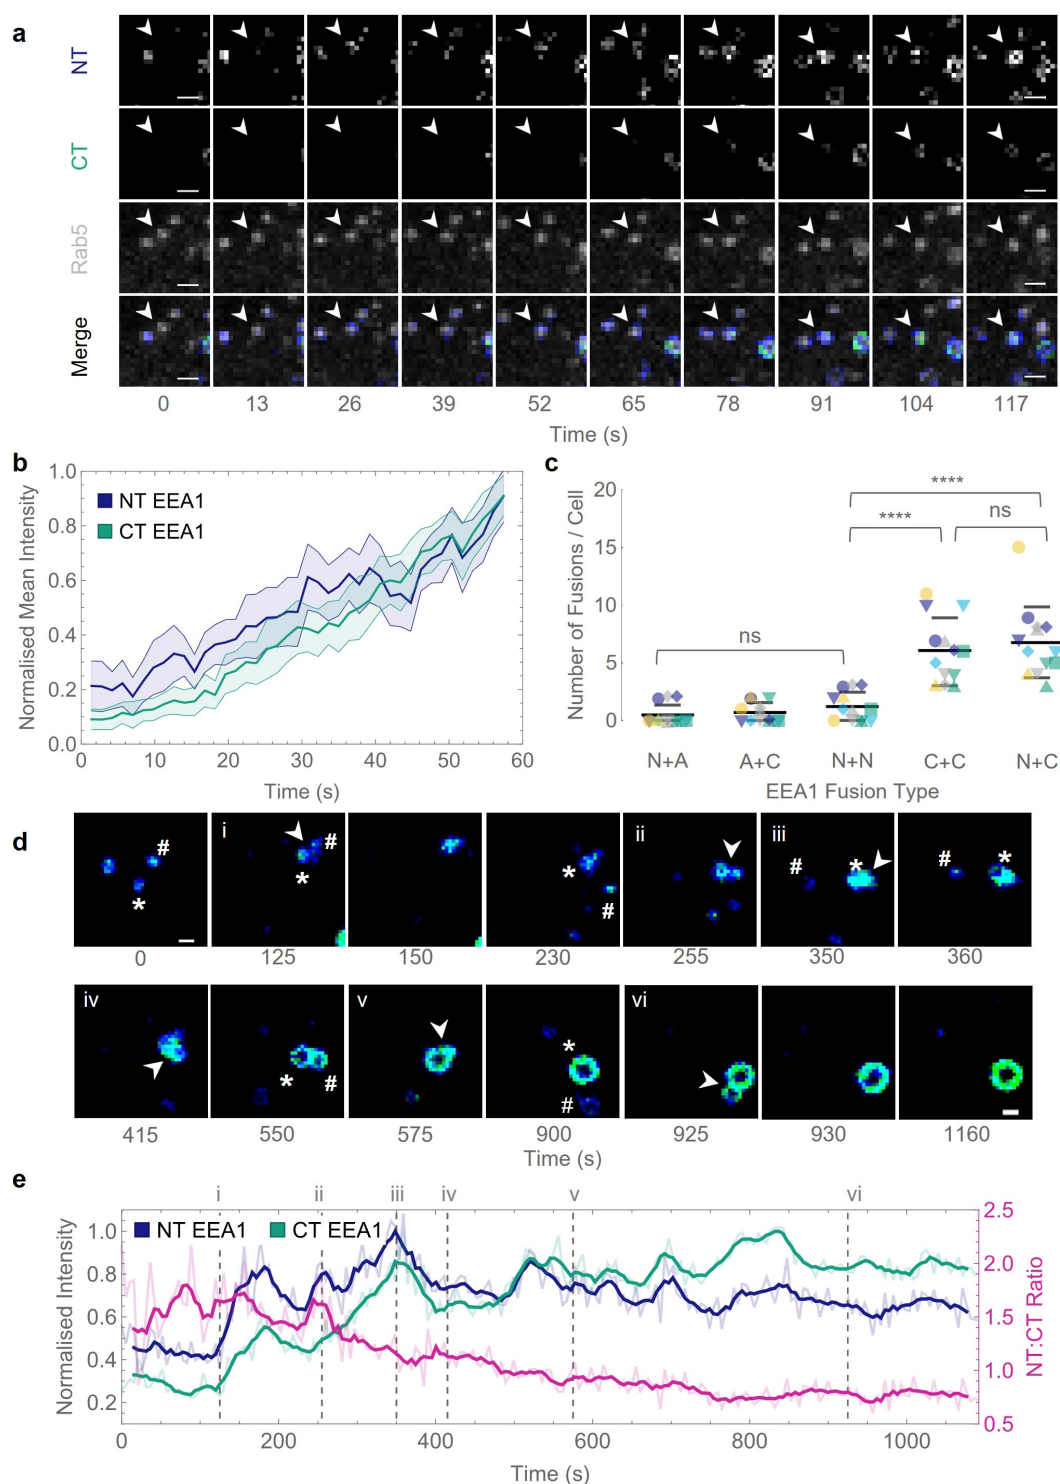

**Fig. 4. EEA1 initially binds via its N-terminal binding domain before maturing into a C-terminal bound endosome.** **a)** Representative montage showing the appearance of N-terminal EEA1 following collision-conversion, imaged by live FLIM-FRET as described in Figure 3a. EEA1-EGFP fluorescence lifetime was fit with a two-component regression ( $\tau_1 = 1.006$  ns,  $\tau_2 = 2.600$  ns). The image is pseudo-coloured by the relative photon contribution from each component; the shorter N-terminal EEA1 component (*blue*), the longer C-terminal EEA1 component (*green*), and Rab5-RFP fluorescence (*grey*). Arrow indicates nascent converting endosome. Scale bar =  $2.5 \mu\text{m}$ , time is measured in seconds. **b)** Normalised mean intensity plot of converting endosomes following seeding at time = 0. Line graphs show mean intensity of N-terminally (*blue*) and C-terminally (*green*) bound EEA1, area fill indicates 95% confidence interval at each time-point. Time is measured in seconds. **c)** Fusions categorised by the participating endosomes: N-terminal bound (N); C-terminal bound (C); and EEA1 absent, Rab5-positive (A). Plots show mean, error bars indicate S.D. Each coloured shape indicates a different cell,  $n = 13$ . ns indicates non-significant difference, \*\*\*\* indicates  $p < 0.0001$ . Each mean was compared against the others using an ordinary one-way ANOVA. **d)** Representative montage of EEA1 N- to C-terminally bound conversion, showing N-terminally (*blue*) and C-terminally (*green*) bound EEA1. Arrows indicate points of fusion as numbered in panel **e**, asterisks indicate 'main' endosome corresponding to the intensity trace, hashes show incident endosomes prior to fusion. Scale bar =  $2.5 \mu\text{m}$ , time is measured in seconds. **e)** Intensity trace of N- to C-terminally bound conversion corresponding to montage in panel **d**. Lines indicate mean relative lifetime amplitudes of N-terminal EEA1 (*blue*), C-terminal EEA1 (*green*), and the N:C intensity ratio (*magenta*); bold lines indicate 3-frame moving average; intensities were manually measured for each endosomal pixel. Dotted lines indicate successive fusion time-points. Time is measured in seconds.

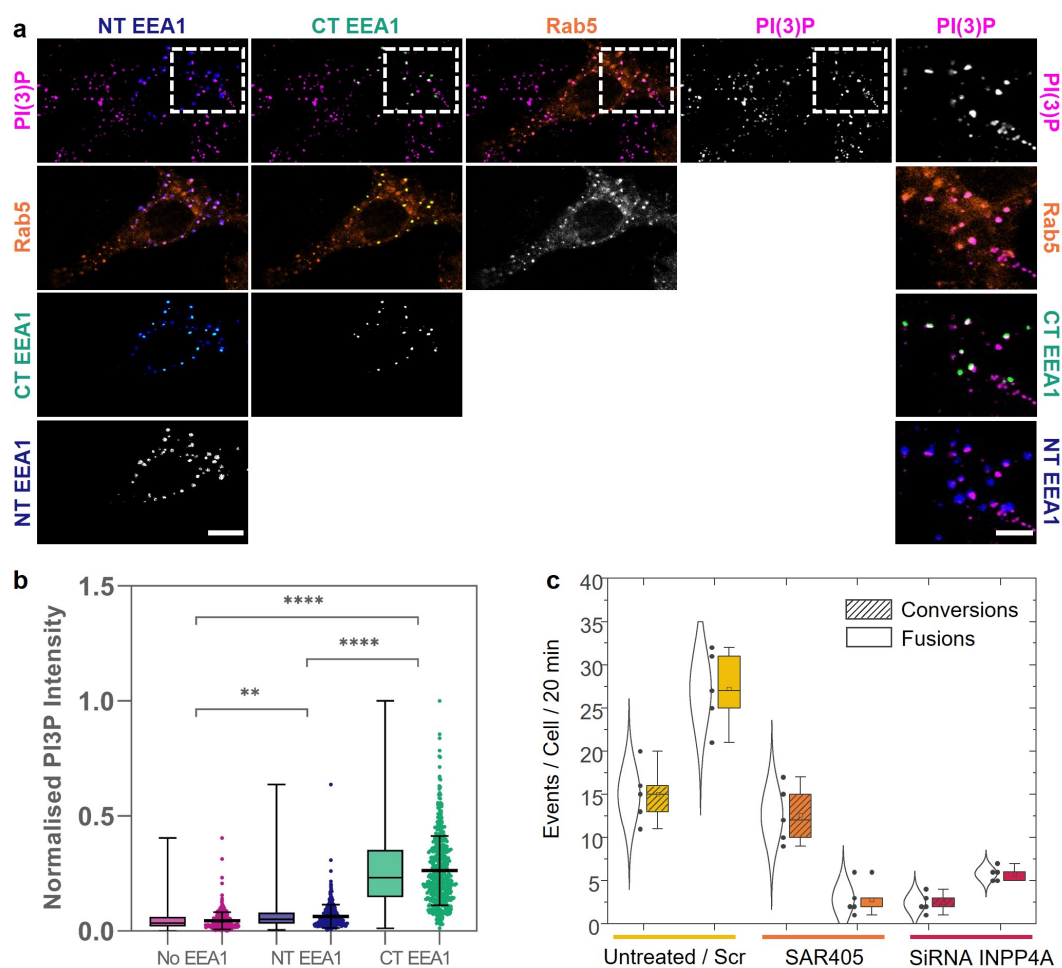

**Fig. 5. INPP4A is the enzyme affecting conversion.** **a**) Representative image of 2xFYVE-GST PI(3)P staining with EEA1 FLIM imaging. NT and CT EEA1 channels were extracted using two-component fitting of fluorescence lifetime and each channel shown combinatorically: PI(3)P (*magenta*), Rab5 (*orange*), CT EEA1 (*green*), and NT EEA1 (*blue*). Dotted box indicates zoomed insert (rightmost column). Scale bar = 10  $\mu\text{m}$ , insert scale bar = 5  $\mu\text{m}$ . **b**) FLIM of orientation with phosphoinositide lipid specificity. Scatter and box-and-whisker plots of PI(3)P staining intensity by endosome type; Rab5 positive and EEA1 negative (*magenta*), NT EEA1 bound (*blue*), or CT EEA1 bound (*green*). PI(3)P intensities are measured using 2xFYVE-GST labelling and normalised across each cell. Error bars on scatter plots indicate mean  $\pm$  S.D. Statistical significance determined using one-way ANOVA, \*\* indicates  $p < 0.01$ , \*\*\*\* indicates  $p < 0.0001$ .  $n = 18$  cells. **c**) SAR405-treated cells show reduced fusions, but not conversions. siRNA-INPP4A-treated cells show reduced fusions and conversions.

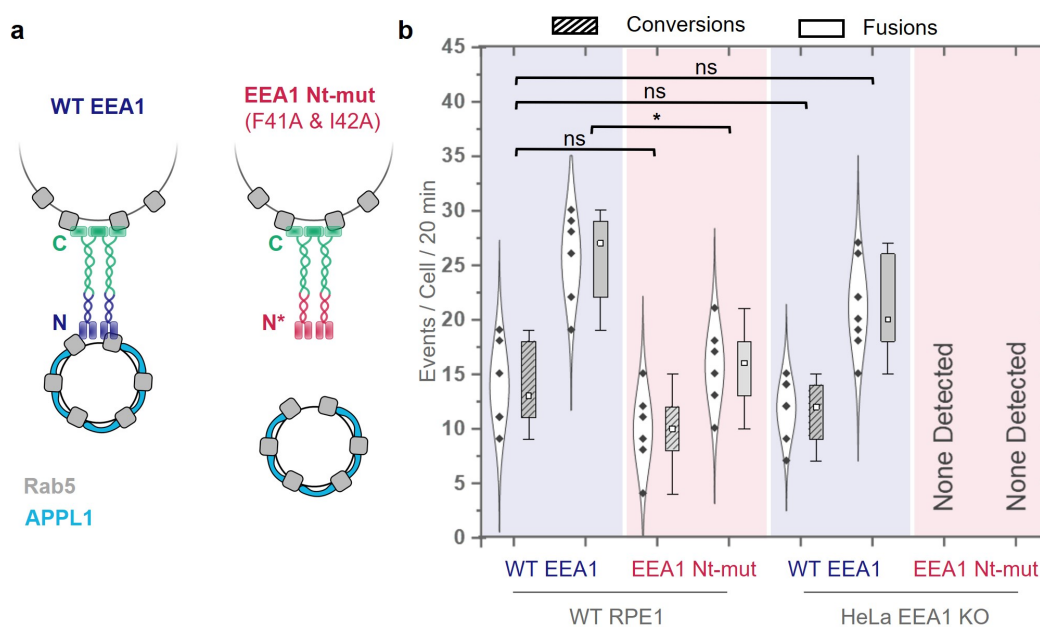

**Fig. 6. The initial N-terminal of EEA1 is essential for endosomal conversions.** **a)** RPE1 wild-type cells and HeLa EEA1 knockout (KO) cell lines expressing wild-type EEA1 (blue) or N-terminal mutant deficient in binding Rab5 (red) were imaged using LLSM. **b)** The total number of conversions and fusions were quantified; these data indicate that the initial N-terminal of EEA1 is essential for endosomal conversions. ns indicates non-significant difference, \* indicates  $p < 0.05$ . Each mean was compared against the others using an ordinary one-way ANOVA. In the case of HeLa EEA1 KO cells expressing EEA1 N-terminal Rab5 binding mutant, no events were detected by the analysis workflow or by visual inspection.



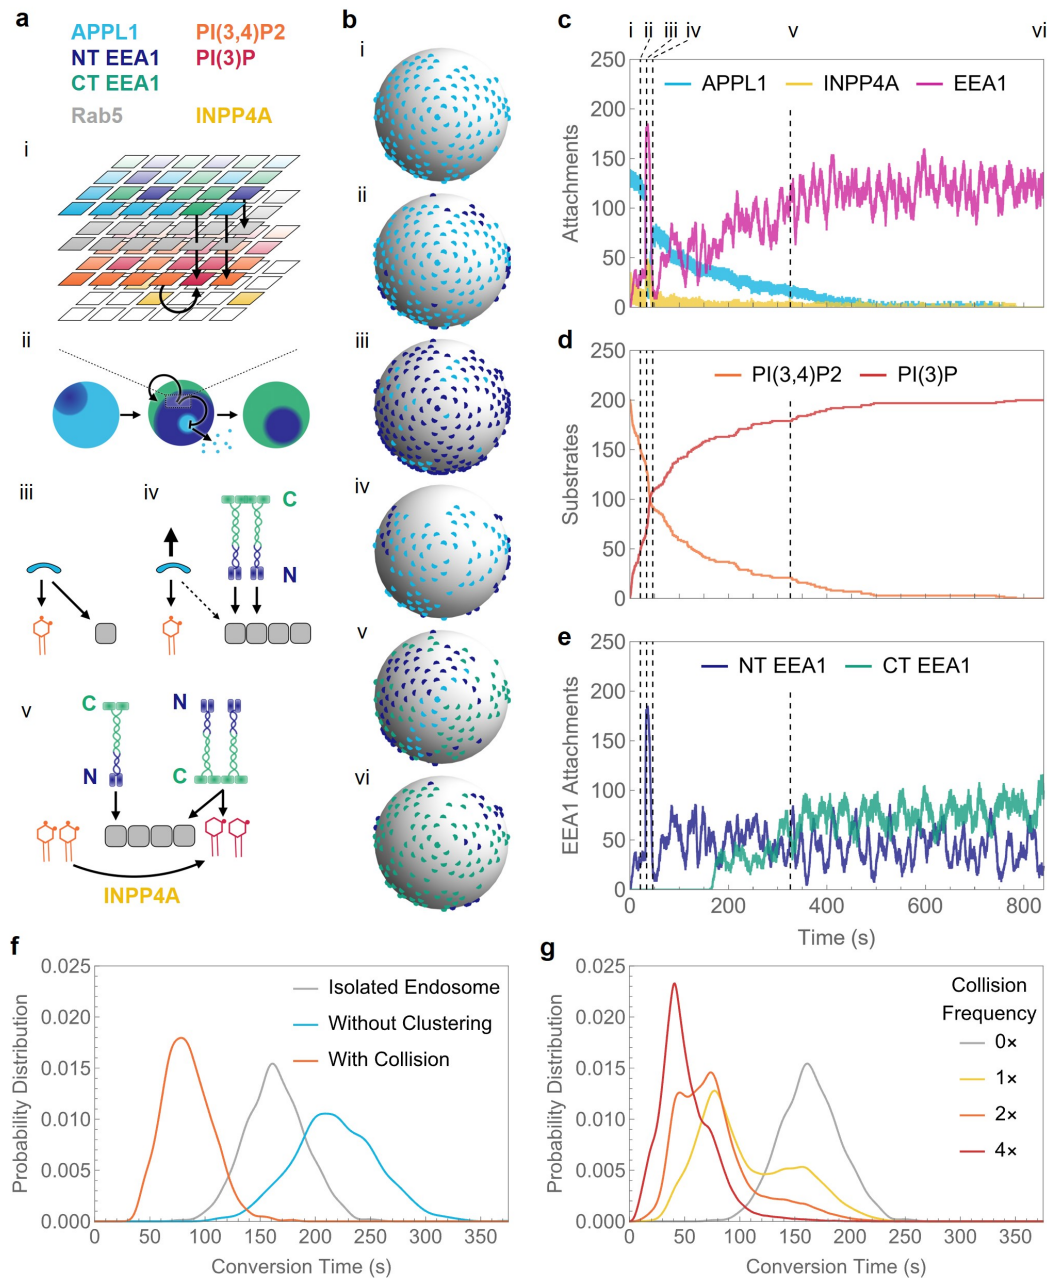

**Fig. 7. Agent-based simulations show the effect of clustering and collision on endosome conversion time.** **a)** Schematic of agent and node logic used in modelling. (i) The endosome is simulated as a multi-layered surface of a sphere, where different layers are occupied by different agents and nodes. The sphere is initially dominated by APPL1 attachments (cyan), which over time are replaced by N-terminal EEA1 (dark blue), and finally C-terminal EEA1 (green). (ii) APPL1 and EEA1 stochastically bind and unbind, competing for Rab5 (grey) binding availability. (iii) APPL1 requires both Rab5 and an adjacent PI(3,4)P2 (orange) to attach. (iv) N-terminal EEA1 replaces APPL1 in binding to Rab5 and frees up PI(3,4)P2. (v) INPP4A (yellow) converts free PI(3,4)P2 to PI(3)P (red). C-terminal EEA1 requires Rab5 and an adjacent PI(3)P to bind. **b)** Example maturation time course of a simulated endosome undergoing collision, showing the attached APPL1 (cyan), N-terminal EEA1 (dark blue), and C-terminal EEA1 (green) on the surface of the simulated endosome at different time-points (marked by dashed lines in panels **c-e**). Initially, the endosome is dominated by APPL1 (i), while N-terminal EEA1 attach in clusters (ii). Upon collision (which takes place here at 31.5 s), there is a large influx of EEA1 N-terminal attachments (iii), which shortly detach due to cluster detachment (iv). However, this duration is sufficient to displace a large number of APPL1, allowing INPP4A to accelerate conversion of PI(3,4)P2 to PI(3)P. Eventually, C-terminal EEA1 attach in clusters (v) and ultimately dominate over N-terminal attachments (vi). **c)** Time series of numbers of attached APPL1, INPP4A, and total EEA1 (including both N- and C-terminal attachments). **d)** Time series of numbers of PI(3,4)P2 and PI(3)P molecules on the endosome's surface. PI(3)P molecules are formed by a 1:1 conversion from PI(3,4)P2 by INPP4A. **e)** Time series of numbers of N- and C-terminal attachments of EEA1. Initially, most attachments are through N-terminal EEA1, while over the course of endosomal conversion, C-terminal attachments eventually become a majority. Collision mainly introduces new N-terminal attachments. For a dynamic version of this figure, refer to Supplementary Movie 9. **f)** Conversion time distributions of simulated isolated endosomes. If the clustering mechanism of EEA1 molecules is removed from the simulation, the conversion time distribution shifts to the right (from grey to cyan), indicating slower conversions. If the isolated endosome is made to undergo collision (which takes place at  $t = 31.5$  s for these simulations), the conversion time distribution shifts to the left (from grey to orange) and conversion time is reduced by almost one third. **g)** Conversion time distributions of a simulated cell in which endosomes collide randomly at a given collision frequency. The grey curve shows the case for no collisions. Upon increasing the collision frequency (i.e., decreasing the average time interval between collisions), the endosomes become more likely to encounter one or multiple collisions, which in turn leads to faster conversions. Hence, the weight of the conversion time distribution shifts further to the left (towards red). There are multiple modes in the conversion time distribution corresponding to the number of collisions the endosome experienced before conversion. The leftmost mode at 20–50 s corresponds to two collisions before conversion, the middle mode at 60–100 s to a single collision, and the rightmost mode at 130–200 s to zero collisions.

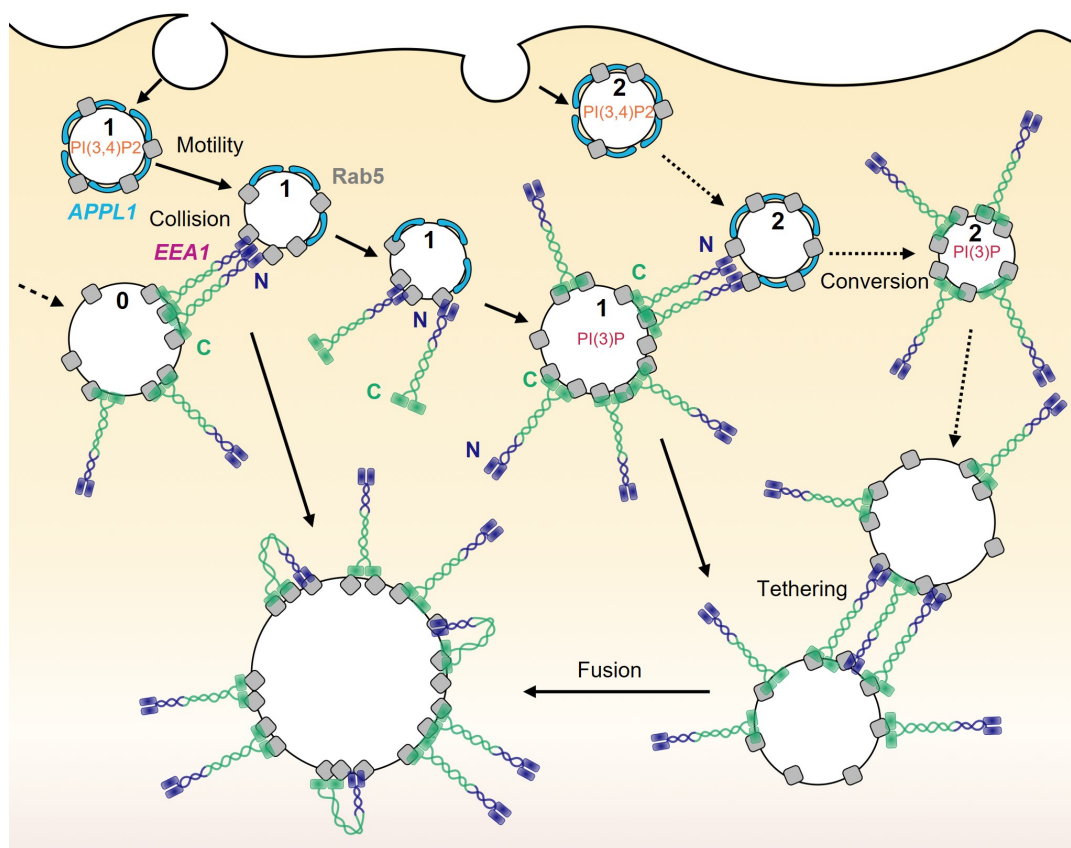

**Fig. 8. Summary of proposed EEA1 'trigger-and-convert' mechanism of maturation.** Very early endosomes formed at the cell periphery (endosome 1) have PI(3,4)P2 (orange)-containing membranes and APPL1 (cyan) bound to Rab5 (grey). These vesicles collide with mature EEA1 vesicles (endosome 0), seeding N-terminally bound EEA1 and triggering the conversion process. This enables the production of PI(3)P (red) and the binding of C-terminal EEA1. These vesicles can trigger conversions on nascent APPL1 vesicles (endosome 2) and participate in canonical endosomal tethering and fusion processes (bottom endosomes).
